# Supplementary material
Source: PubMed Central journal article supplement (PMC8103656)

## Supporting Information for:

# Stereoselectivity predictions for the Pd-catalyzed 1,4-conjugate addition using Q2MM

Jessica Wahlers,<sup>1</sup> Michael Maloney,<sup>1</sup> Farbod Salahi,<sup>1</sup> Anthony R. Rosales,<sup>1</sup> Paul Helquist,<sup>1</sup>

Per-Ola Norrby,<sup>2,3</sup> Olaf Wiest\*<sup>1</sup>

<sup>1</sup> Department of Chemistry and Biochemistry, University of Notre Dame, Notre Dame, IN 46556, USA.

<sup>2</sup> Data Science and Modelling, Pharmaceutical Sciences, R&D, AstraZeneca Gothenburg, Pepparedsleden 1, SE-431 83 Mölndal, Sweden.

<sup>3</sup> Department of Chemistry and Molecular Biology, University of Gothenburg, SE-412 96 Gothenburg, Sweden

### Table of Content

|                                                                                                                                     |      |
|-------------------------------------------------------------------------------------------------------------------------------------|------|
| Table S1 QM Structures in Training Set                                                                                              | S-2  |
| Table S2: TSFF Parameters added to the Standard MM3 Force Field                                                                     | S-13 |
| Details of Force field parameterization                                                                                             | S-16 |
| Figure S1: Comparison of Point Charges from TSFF and QM                                                                             | S-17 |
| Figure S2: Comparison of Bond Lengths and Angles from TSFF and QM                                                                   | S-17 |
| Figure S3: Comparison of Torsional Angles from TSFF and QM                                                                          | S-18 |
| Figure S4: Comparison of Hessian Diagonal Eigenvalues from TSFF and QM                                                              | S-18 |
| Figure S5: Structures of Validation Set                                                                                             | S-19 |
| Table S3: Results for Validation Set                                                                                                | S-21 |
| Figure S6: Structures in Ligand Screen                                                                                              | S-23 |
| Table S4: Results of Ligand Screen                                                                                                  | S-24 |
| Table S5: Coordinates of the 4 TS catalyzed by the PyrOx ligand containing a t-Bu group in the 6 position(enone092) optimized by MM | S-24 |
| Figure S7: MM optimized structures of the 4 TS of enone092                                                                          | S-31 |
| Table S6: Coordinates of the 4 TS catalyzed by the PyrOx ligand containing a t-Bu group in the 6 position(enone092) optimized by QM | S-31 |
| Figure S8 Structures in enone screen                                                                                                | S-38 |
| Table S7: Results for Substrate Screen                                                                                              | S-40 |
| Figure S9: Chromatogram of the racemic $\pm$ 3-methyl-3-phenylcyclohexanone                                                         | S-42 |
| Figure S10: Chromatogram of sample obtained using the (S)- <sup>t</sup> butylPyrOx ligand                                           | S-42 |
| Figure S11: Chromatogram of sample obtained using the CF <sub>3</sub> substituted ligand                                            | S-43 |
| Figure S12: H <sup>1</sup> NMR of sample obtained using the CF <sub>3</sub> substituted ligand                                      | S-43 |

**Table S1 QM structures in Training Set**

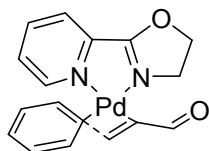

TS 1.

Gibbs Free Energy: -1043.630127 (Hartrees)

Imaginary Frequency: -253.28 cm<sup>-1</sup>

Cartesian coordinates and point charges:

|    |           |           |           |           |
|----|-----------|-----------|-----------|-----------|
| Pd | 0.041817  | -0.684382 | 0.182160  | -0.253110 |
| C  | 4.592934  | 0.602094  | -0.110789 | -0.027170 |
| C  | 4.018355  | 0.428767  | 1.148175  | -0.083900 |
| C  | 2.781911  | -0.204419 | 1.273404  | -0.213940 |
| C  | 2.122801  | -0.650881 | 0.126470  | 0.279800  |
| C  | 2.700522  | -0.499305 | -1.136000 | -0.159160 |
| C  | 3.934685  | 0.139005  | -1.250587 | -0.099990 |
| H  | 5.564199  | 1.084422  | -0.203757 | 0.101060  |
| H  | 4.536170  | 0.778104  | 2.040073  | 0.115500  |
| H  | 2.338302  | -0.346097 | 2.260034  | 0.153390  |
| H  | 2.194039  | -0.874951 | -2.027065 | 0.117500  |
| H  | 4.386879  | 0.263606  | -2.233321 | 0.120900  |
| C  | -0.045238 | -2.779528 | 0.368967  | 0.014560  |
| C  | 1.355797  | -2.611047 | 0.412379  | -0.150220 |
| H  | -0.615344 | -2.961413 | 1.284703  | 0.118120  |
| C  | -0.688635 | -3.195637 | -0.897966 | 0.422420  |
| O  | -1.854321 | -3.510309 | -0.986584 | -0.461170 |
| H  | -0.018542 | -3.191154 | -1.791502 | 0.038090  |
| H  | 1.939140  | -2.918943 | -0.455684 | 0.094350  |
| H  | 1.873242  | -2.707110 | 1.364049  | 0.134140  |
| C  | -0.629045 | 4.223928  | -0.333258 | 0.055490  |
| C  | -1.676275 | 3.311452  | -0.207451 | -0.164700 |
| C  | -1.359861 | 1.971141  | -0.056430 | 0.240120  |
| C  | 0.906923  | 2.390922  | -0.148572 | 0.210430  |
| C  | 0.677395  | 3.758408  | -0.303327 | -0.167990 |
| H  | -0.837528 | 5.284760  | -0.454131 | 0.123700  |
| H  | -2.717389 | 3.625087  | -0.225710 | 0.136850  |
| H  | 1.917364  | 1.984403  | -0.119686 | 0.025650  |
| H  | 1.520934  | 4.437400  | -0.398063 | 0.140160  |
| C  | -2.372597 | 0.921774  | 0.086519  | 0.340610  |
| C  | -4.387036 | -0.022032 | 0.139209  | 0.253100  |
| C  | -3.301836 | -1.073852 | 0.409078  | -0.029930 |
| H  | -5.144318 | 0.064655  | 0.921370  | 0.053090  |
| H  | -4.873200 | -0.136227 | -0.835186 | 0.046710  |
| H  | -3.343132 | -1.932556 | -0.270161 | 0.084450  |
| H  | -3.322407 | -1.459905 | 1.437500  | 0.069380  |
| O  | -3.655479 | 1.241449  | 0.100776  | -0.358020 |

|   |           |           |           |           |
|---|-----------|-----------|-----------|-----------|
| N | -2.058702 | -0.319074 | 0.210819  | -0.098170 |
| N | -0.088212 | 1.515304  | -0.025859 | -0.222100 |

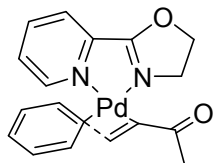

TS 2.

Gibbs Free Energy: -1082.89913 (Hartrees)

Imaginary Frequency: -254.32 cm<sup>-1</sup>

Cartesian coordinates and point charges:

|    |           |           |           |           |
|----|-----------|-----------|-----------|-----------|
| Pd | -0.024175 | -0.538439 | -0.257068 | -0.239250 |
| C  | -4.638681 | 0.532780  | -0.044464 | -0.064690 |
| C  | -4.005545 | 0.448356  | -1.284536 | -0.061860 |
| C  | -2.741749 | -0.130862 | -1.388807 | -0.226330 |
| C  | -2.107052 | -0.609793 | -0.239982 | 0.304050  |
| C  | -2.742399 | -0.542330 | 1.002192  | -0.201830 |
| C  | -4.007994 | 0.036548  | 1.096134  | -0.068650 |
| H  | -5.631653 | 0.971842  | 0.031550  | 0.110840  |
| H  | -4.499625 | 0.823911  | -2.179211 | 0.109990  |
| H  | -2.257259 | -0.209869 | -2.363113 | 0.153950  |
| H  | -2.260622 | -0.937667 | 1.897496  | 0.131270  |
| H  | -4.503200 | 0.091157  | 2.064413  | 0.113370  |
| C  | 0.159971  | -2.605440 | -0.613296 | -0.119720 |
| C  | -1.249241 | -2.507392 | -0.589813 | -0.061810 |
| H  | 0.670363  | -2.667334 | -1.579587 | 0.137460  |
| C  | 0.972921  | -3.150791 | 0.518127  | 0.609750  |
| O  | 2.148882  | -3.400390 | 0.320491  | -0.534330 |
| H  | -1.797893 | -2.898492 | 0.265480  | 0.067110  |
| H  | -1.786030 | -2.576447 | -1.533468 | 0.108640  |
| C  | 0.385425  | 4.357058  | 0.588468  | 0.058240  |
| C  | 1.476491  | 3.516446  | 0.371192  | -0.163550 |
| C  | 1.229551  | 2.172412  | 0.141406  | 0.240620  |
| C  | -1.051793 | 2.454587  | 0.324856  | 0.208650  |
| C  | -0.893656 | 3.819935  | 0.565286  | -0.178260 |
| H  | 0.538774  | 5.418067  | 0.773520  | 0.123010  |
| H  | 2.498804  | 3.886996  | 0.378713  | 0.134080  |
| H  | -2.038100 | 1.992156  | 0.298154  | 0.027910  |
| H  | -1.770307 | 4.440811  | 0.731318  | 0.143380  |
| C  | 2.297040  | 1.198019  | -0.096863 | 0.352100  |
| C  | 4.367348  | 0.405536  | -0.290183 | 0.232270  |
| C  | 3.345066  | -0.708260 | -0.557235 | -0.035140 |
| H  | 5.070462  | 0.585250  | -1.106605 | 0.059440  |
| H  | 4.917412  | 0.278559  | 0.647855  | 0.048700  |
| H  | 3.479216  | -1.586476 | 0.082132  | 0.094670  |
| H  | 3.345549  | -1.057912 | -1.598449 | 0.077880  |

|   |           |           |           |           |
|---|-----------|-----------|-----------|-----------|
| O | 3.553965  | 1.607682  | -0.142788 | -0.356890 |
| N | 2.060806  | -0.053638 | -0.275416 | -0.117470 |
| N | -0.014135 | 1.646877  | 0.116855  | -0.230850 |
| C | 0.323152  | -3.389299 | 1.852161  | -0.278920 |
| H | -0.253930 | -2.518269 | 2.190477  | 0.072940  |
| H | -0.367899 | -4.242093 | 1.794690  | 0.111560  |
| H | 1.095385  | -3.622071 | 2.590178  | 0.107660  |

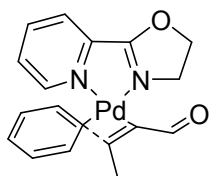

TS 3.

Gibbs Free Energy: -1082.891641 (Hartrees)

Imaginary Frequency: -281.08  $\text{cm}^{-1}$

Cartesian coordinates and point charges:

|    |           |           |           |           |
|----|-----------|-----------|-----------|-----------|
| Pd | -0.090039 | -0.554965 | -0.110601 | -0.307880 |
| C  | -4.169071 | 1.765390  | 0.332337  | -0.031750 |
| C  | -3.702103 | 1.453884  | -0.944758 | -0.108920 |
| C  | -2.676268 | 0.523379  | -1.107042 | -0.132450 |
| C  | -2.115568 | -0.091375 | 0.015828  | 0.289460  |
| C  | -2.590485 | 0.211998  | 1.296197  | -0.160190 |
| C  | -3.611585 | 1.147618  | 1.452302  | -0.113540 |
| H  | -4.977635 | 2.483711  | 0.454749  | 0.107520  |
| H  | -4.140141 | 1.931544  | -1.819939 | 0.116980  |
| H  | -2.319740 | 0.279912  | -2.108965 | 0.114810  |
| H  | -2.167514 | -0.281625 | 2.173586  | 0.115140  |
| H  | -3.980280 | 1.383635  | 2.449191  | 0.124290  |
| C  | -0.544268 | -2.596003 | -0.115632 | -0.130710 |
| C  | -1.908477 | -2.211970 | -0.204309 | 0.144090  |
| H  | -0.043741 | -3.001919 | -1.002518 | 0.125690  |
| C  | 0.016620  | -3.006181 | 1.189668  | 0.464880  |
| O  | 1.088353  | -3.557131 | 1.319178  | -0.471220 |
| H  | -0.618489 | -2.763498 | 2.075980  | 0.016310  |
| H  | -2.480068 | -2.287777 | 0.723534  | 0.036240  |
| C  | 1.751338  | 4.066598  | 0.148601  | 0.059960  |
| C  | 2.543201  | 2.923512  | 0.042069  | -0.181810 |
| C  | 1.908271  | 1.695112  | -0.050244 | 0.261080  |
| C  | -0.185957 | 2.655494  | 0.063560  | 0.215680  |
| C  | 0.370488  | 3.931376  | 0.159564  | -0.176030 |
| H  | 2.213261  | 5.048545  | 0.225755  | 0.122390  |
| H  | 3.629318  | 2.976011  | 0.033218  | 0.140900  |
| H  | -1.265209 | 2.503923  | 0.068842  | 0.018630  |
| H  | -0.281455 | 4.797322  | 0.241791  | 0.141960  |
| C  | 2.636296  | 0.427379  | -0.154653 | 0.315260  |
| C  | 4.366173  | -0.972516 | -0.165942 | 0.202670  |

|   |           |           |           |           |
|---|-----------|-----------|-----------|-----------|
| C | 3.054682  | -1.748127 | -0.359956 | -0.015630 |
| H | 5.102441  | -1.113400 | -0.960391 | 0.064180  |
| H | 4.836537  | -1.146068 | 0.807426  | 0.059830  |
| H | 2.899045  | -2.540508 | 0.380952  | 0.083850  |
| H | 2.962819  | -2.198309 | -1.357880 | 0.066290  |
| O | 3.958834  | 0.428915  | -0.192739 | -0.348240 |
| N | 2.032636  | -0.706180 | -0.211318 | -0.056980 |
| N | 0.563913  | 1.560910  | -0.041619 | -0.228040 |
| C | -2.673347 | -2.472908 | -1.461959 | -0.188150 |
| H | -2.854995 | -3.556492 | -1.518731 | 0.102050  |
| H | -3.643579 | -1.968706 | -1.478759 | 0.048200  |
| H | -2.101788 | -2.191240 | -2.354944 | 0.093190  |

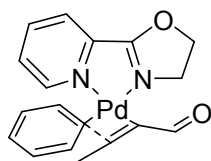

TS 4.

Gibbs Free Energy: -1082.889348 (Hartrees)

Imaginary Frequency: -278.93  $\text{cm}^{-1}$

Cartesian coordinates and point charges:

|    |           |           |           |           |
|----|-----------|-----------|-----------|-----------|
| Pd | -0.091902 | -0.504839 | -0.206403 | -0.396710 |
| C  | -4.109640 | 1.950733  | 0.288410  | -0.092130 |
| C  | -3.665332 | 1.697403  | -1.008954 | -0.036130 |
| C  | -2.640628 | 0.776715  | -1.230319 | -0.298750 |
| C  | -2.068518 | 0.105212  | -0.146444 | 0.559120  |
| C  | -2.519070 | 0.353062  | 1.155168  | -0.242060 |
| C  | -3.530150 | 1.285729  | 1.370805  | -0.068150 |
| H  | -4.915743 | 2.662481  | 0.456651  | 0.117300  |
| H  | -4.121598 | 2.210809  | -1.853973 | 0.109450  |
| H  | -2.298233 | 0.579824  | -2.247569 | 0.138930  |
| H  | -2.085569 | -0.183222 | 2.001961  | 0.122690  |
| H  | -3.874611 | 1.485601  | 2.384230  | 0.116620  |
| C  | -0.707667 | -2.492823 | -0.491888 | -0.085520 |
| C  | -2.020040 | -1.982221 | -0.682420 | 0.000610  |
| H  | -0.120119 | -2.749893 | -1.380682 | 0.130430  |
| C  | -0.278533 | -3.175692 | 0.745034  | 0.471960  |
| O  | 0.748815  | -3.818372 | 0.813516  | -0.486490 |
| H  | -0.928951 | -3.050548 | 1.639980  | 0.022310  |
| H  | -2.261124 | -1.758073 | -1.723297 | 0.105410  |
| C  | 2.059604  | 3.957415  | 0.229086  | 0.055540  |
| C  | 2.772554  | 2.760651  | 0.166641  | -0.173220 |
| C  | 2.057324  | 1.579342  | 0.050878  | 0.248630  |
| C  | 0.032786  | 2.686419  | 0.063665  | 0.188750  |
| C  | 0.673544  | 3.920507  | 0.177315  | -0.163370 |
| H  | 2.585687  | 4.905473  | 0.318236  | 0.121870  |
| H  | 3.858938  | 2.735949  | 0.205454  | 0.140340  |

|   |           |           |           |           |
|---|-----------|-----------|-----------|-----------|
| H | -1.053450 | 2.610404  | 0.019713  | 0.019630  |
| H | 0.081704  | 4.831237  | 0.222715  | 0.141970  |
| C | 2.699580  | 0.263850  | -0.029386 | 0.321000  |
| C | 4.330919  | -1.250362 | 0.016322  | 0.250250  |
| C | 2.979190  | -1.932335 | -0.245968 | -0.084980 |
| H | 5.083629  | -1.419278 | -0.757310 | 0.056590  |
| H | 4.755766  | -1.480394 | 0.998557  | 0.046230  |
| H | 2.732983  | -2.716094 | 0.479393  | 0.107200  |
| H | 2.906921  | -2.378828 | -1.246955 | 0.080550  |
| O | 4.019361  | 0.175438  | 0.014259  | -0.362890 |
| N | 2.023888  | -0.822998 | -0.146738 | -0.024290 |
| N | 0.707898  | 1.540815  | -0.001273 | -0.208380 |
| C | -3.204950 | -2.396187 | 0.138352  | -0.154910 |
| H | -4.071289 | -1.755532 | -0.056499 | 0.028500  |
| H | -3.464317 | -3.422035 | -0.166043 | 0.108110  |
| H | -3.016877 | -2.411041 | 1.216068  | 0.068000  |

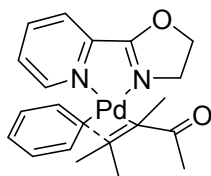

TS 5.

Gibbs Free Energy: -1200.6682 (Hartrees)

Imaginary Frequency: -288.46  $\text{cm}^{-1}$

Cartesian coordinates and point charges:

|    |           |           |           |           |
|----|-----------|-----------|-----------|-----------|
| Pd | -0.078818 | -0.234803 | -0.090490 | -0.498300 |
| C  | -3.262539 | 3.199692  | -0.129832 | -0.046900 |
| C  | -2.854988 | 2.591359  | -1.318228 | -0.120230 |
| C  | -2.186741 | 1.370613  | -1.282250 | -0.187010 |
| C  | -1.905791 | 0.753569  | -0.054869 | 0.478570  |
| C  | -2.297275 | 1.379543  | 1.133187  | -0.216890 |
| C  | -2.978106 | 2.596761  | 1.094467  | -0.096070 |
| H  | -3.805775 | 4.142570  | -0.159030 | 0.110710  |
| H  | -3.065260 | 3.064276  | -2.276308 | 0.119680  |
| H  | -1.883570 | 0.899638  | -2.218548 | 0.132890  |
| H  | -2.076961 | 0.924688  | 2.099201  | 0.124030  |
| H  | -3.288388 | 3.070465  | 2.024750  | 0.115820  |
| C  | -1.140963 | -2.031386 | -0.327288 | 0.223570  |
| C  | -2.379656 | -1.347050 | -0.021950 | 0.031100  |
| C  | -0.432867 | -2.915678 | 0.683211  | 0.582940  |
| O  | 0.100207  | -3.932615 | 0.273873  | -0.520720 |
| C  | 2.978459  | 3.699274  | 0.270676  | 0.058060  |
| C  | 3.427097  | 2.386712  | 0.131016  | -0.181500 |
| C  | 2.479725  | 1.377727  | 0.042002  | 0.218040  |
| C  | 0.730505  | 2.868117  | 0.220429  | 0.165440  |
| C  | 1.613460  | 3.943976  | 0.315102  | -0.165730 |

|   |           |           |           |           |
|---|-----------|-----------|-----------|-----------|
| H | 3.692313  | 4.516918  | 0.343826  | 0.119090  |
| H | 4.486351  | 2.144628  | 0.090932  | 0.138110  |
| H | -0.348846 | 3.014536  | 0.254811  | 0.027050  |
| H | 1.222725  | 4.952802  | 0.422110  | 0.139920  |
| C | 2.839419  | -0.035041 | -0.118975 | 0.347810  |
| C | 4.164053  | -1.817400 | -0.292769 | 0.145490  |
| C | 2.689899  | -2.229314 | -0.418973 | 0.025810  |
| H | 4.782764  | -2.080326 | -1.154206 | 0.077630  |
| H | 4.643261  | -2.174427 | 0.624479  | 0.067000  |
| H | 2.389534  | -2.991946 | 0.308582  | 0.067370  |
| H | 2.434585  | -2.615890 | -1.414869 | 0.067650  |
| O | 4.120364  | -0.364270 | -0.214061 | -0.338800 |
| N | 1.964266  | -0.974207 | -0.187844 | -0.095990 |
| N | 1.151677  | 1.612431  | 0.087316  | -0.142170 |
| C | -0.290876 | -2.562072 | 2.144764  | -0.396370 |
| H | -0.329762 | -1.485300 | 2.349672  | 0.103860  |
| H | -1.069601 | -3.064569 | 2.734348  | 0.133850  |
| H | 0.670820  | -2.960358 | 2.488005  | 0.130680  |
| C | -3.029260 | -1.480995 | 1.333550  | -0.281290 |
| H | -3.374720 | -2.522361 | 1.433860  | 0.114210  |
| H | -2.383648 | -1.267536 | 2.185478  | 0.096260  |
| H | -3.912853 | -0.838025 | 1.403013  | 0.090720  |
| C | -0.901166 | -2.478454 | -1.752753 | -0.440440 |
| H | 0.122478  | -2.841446 | -1.877295 | 0.146160  |
| H | -1.564611 | -3.315301 | -2.020277 | 0.120680  |
| H | -1.070171 | -1.671412 | -2.474930 | 0.155740  |
| C | -3.435747 | -1.305175 | -1.098905 | -0.146010 |
| H | -3.888272 | -2.310248 | -1.138717 | 0.110940  |
| H | -4.227933 | -0.590579 | -0.850341 | 0.039500  |
| H | -3.064839 | -1.081026 | -2.100485 | 0.048030  |

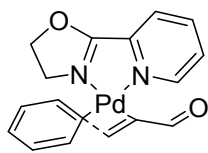

TS 6.

Gibbs Free Energy: -1043.630149 (Hartrees)

Imaginary Frequency: -258.57  $\text{cm}^{-1}$

Cartesian coordinates and point charges:

|    |           |           |           |           |
|----|-----------|-----------|-----------|-----------|
| Pd | -0.132984 | -0.599264 | -0.171545 | -0.268600 |
| C  | -0.085500 | -2.698225 | -0.457888 | 0.081170  |
| C  | -1.480641 | -2.501905 | -0.504878 | -0.204240 |
| C  | -2.212701 | -0.535880 | -0.131613 | 0.337190  |
| N  | -0.067723 | 1.529392  | 0.044795  | -0.198140 |
| N  | 2.027516  | -0.172637 | -0.127091 | -0.171580 |
| C  | -2.865963 | -0.034885 | -1.257794 | -0.210290 |
| C  | -4.663403 | 0.735309  | 0.164390  | -0.113770 |
| C  | -4.095136 | 0.604860  | -1.102329 | -0.064990 |

|   |           |           |           |           |
|---|-----------|-----------|-----------|-----------|
| C | -2.781295 | -0.427930 | 1.138290  | -0.174200 |
| C | -4.007980 | 0.218276  | 1.282023  | -0.048260 |
| H | -5.628798 | 1.224599  | 0.279504  | 0.123070  |
| H | -4.612061 | 0.995070  | -1.977793 | 0.117580  |
| H | -2.424906 | -0.141258 | -2.250015 | 0.142120  |
| H | -2.276635 | -0.846624 | 2.010953  | 0.113160  |
| H | -4.456840 | 0.307187  | 2.270181  | 0.112780  |
| H | 0.483756  | -2.839511 | -1.381465 | 0.091160  |
| C | 0.531717  | -3.208084 | 0.782345  | 0.410930  |
| O | 1.684191  | -3.577638 | 0.853893  | -0.461800 |
| C | 1.123908  | 2.007321  | 0.079104  | 0.394150  |
| C | 2.305259  | 1.149077  | -0.022543 | 0.177730  |
| C | 3.046715  | -1.028888 | -0.209959 | 0.227030  |
| O | 1.265437  | 3.315998  | 0.215867  | -0.340190 |
| C | 3.595523  | 1.650663  | -0.002665 | -0.142650 |
| C | 4.655902  | 0.749595  | -0.099924 | 0.048370  |
| C | 4.376688  | -0.603984 | -0.202927 | -0.192880 |
| C | -0.079304 | 3.862566  | 0.350012  | 0.141320  |
| C | -1.005183 | 2.647888  | 0.155475  | 0.166250  |
| H | 3.758134  | 2.722001  | 0.088942  | 0.128950  |
| H | 5.683300  | 1.106780  | -0.089482 | 0.127320  |
| H | -0.143988 | 4.313453  | 1.344762  | 0.071230  |
| H | -0.191138 | 4.638950  | -0.411068 | 0.072820  |
| H | -1.613249 | 2.709953  | -0.756055 | 0.006970  |
| H | 5.170347  | -1.343382 | -0.273613 | 0.157050  |
| H | 2.798723  | -2.089744 | -0.254308 | 0.075070  |
| H | -1.687092 | 2.483810  | 0.998659  | -0.006370 |
| H | -1.993032 | -2.535398 | -1.463345 | 0.141310  |
| H | -2.078588 | -2.836474 | 0.343005  | 0.093030  |
| H | -0.137901 | -3.222075 | 1.675467  | 0.040200  |

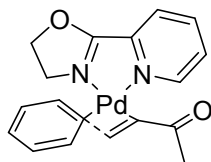

TS 7.

Gibbs Free Energy: -1082.896544 (Hartrees)

Imaginary Frequency: -260.29  $\text{cm}^{-1}$

Cartesian coordinates and point charges:

|    |           |           |           |           |
|----|-----------|-----------|-----------|-----------|
| Pd | -0.129216 | -0.456686 | -0.249796 | -0.227390 |
| C  | -0.056604 | -2.532945 | -0.663151 | -0.068540 |
| C  | -1.456603 | -2.353966 | -0.659992 | -0.090710 |
| C  | -2.212432 | -0.421069 | -0.247264 | 0.305660  |
| N  | -0.097623 | 1.652746  | 0.153708  | -0.228980 |
| N  | 2.025296  | 0.016552  | -0.222899 | -0.189570 |
| C  | -2.817412 | 0.119754  | -1.383331 | -0.211050 |



|   |           |           |           |           |
|---|-----------|-----------|-----------|-----------|
| C | -4.671270 | 0.858037  | -0.018364 | -0.146490 |
| C | -4.047641 | 0.763781  | -1.262245 | -0.017120 |
| C | -2.837849 | -0.346864 | 0.998293  | -0.179530 |
| C | -4.067771 | 0.300745  | 1.108278  | -0.046340 |
| H | -5.637964 | 1.350205  | 0.070421  | 0.129770  |
| H | -4.522933 | 1.184227  | -2.147281 | 0.102150  |
| H | -2.338018 | 0.036507  | -2.359812 | 0.137850  |
| H | -2.376092 | -0.787975 | 1.882808  | 0.118360  |
| H | -4.557846 | 0.361359  | 2.078900  | 0.113030  |
| H | 0.461529  | -2.593421 | -1.625550 | 0.112970  |
| C | 0.690859  | -3.179483 | 0.455274  | 0.581300  |
| O | 1.848549  | -3.515022 | 0.264174  | -0.518150 |
| C | 1.085366  | 2.147633  | 0.213814  | 0.413720  |
| C | 2.279465  | 1.327292  | 0.007454  | 0.176370  |
| C | 3.059354  | -0.799412 | -0.433782 | 0.235780  |
| O | 1.207904  | 3.441341  | 0.468445  | -0.340950 |
| C | 3.559158  | 1.854572  | 0.042938  | -0.159940 |
| C | 4.634977  | 0.994095  | -0.175534 | 0.062620  |
| C | 4.380080  | -0.346058 | -0.418183 | -0.199850 |
| C | -0.145461 | 3.962538  | 0.611009  | 0.124660  |
| C | -1.051276 | 2.733581  | 0.407001  | 0.188430  |
| H | 3.701690  | 2.915140  | 0.236905  | 0.132880  |
| H | 5.654541  | 1.372703  | -0.154216 | 0.122440  |
| H | -0.216320 | 4.409269  | 1.606539  | 0.075150  |
| H | -0.272619 | 4.739906  | -0.147639 | 0.073500  |
| H | -1.732533 | 2.837956  | -0.446515 | -0.003660 |
| H | 5.185421  | -1.055307 | -0.591377 | 0.157150  |
| H | 2.831909  | -1.853178 | -0.596246 | 0.075540  |
| H | -1.658675 | 2.492542  | 1.288475  | -0.003280 |
| H | -1.979972 | -2.353106 | -1.613529 | 0.113190  |
| H | -2.044279 | -2.738849 | 0.171691  | 0.058180  |
| C | 0.008231  | -3.410883 | 1.773456  | -0.269030 |
| H | 0.743347  | -3.769242 | 2.498910  | 0.097680  |
| H | -0.462215 | -2.494127 | 2.153948  | 0.079260  |
| H | -0.779393 | -4.170761 | 1.673551  | 0.112950  |

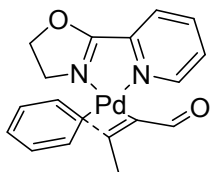

TS 8.

Gibbs Free Energy: -1082.891922 (Hartrees)

Imaginary Frequency: -283.92  $\text{cm}^{-1}$

Cartesian coordinates and point charges:

|    |           |           |           |           |
|----|-----------|-----------|-----------|-----------|
| Pd | -0.110425 | -0.470045 | -0.080490 | -0.309560 |
| C  | -0.422696 | -2.545720 | -0.212485 | -0.094280 |

|   |           |           |           |           |
|---|-----------|-----------|-----------|-----------|
| C | -1.808753 | -2.256917 | -0.309317 | 0.067650  |
| C | -2.163965 | -0.167137 | 0.015725  | 0.317010  |
| N | 0.272595  | 1.639681  | -0.013201 | -0.205360 |
| N | 2.086270  | -0.367308 | -0.101528 | -0.107310 |
| C | -2.754897 | 0.463544  | -1.081496 | -0.097240 |
| C | -4.353697 | 1.509900  | 0.399459  | -0.115230 |
| C | -3.850299 | 1.302818  | -0.885011 | -0.079890 |
| C | -2.670541 | 0.033098  | 1.303733  | -0.200320 |
| C | -3.762789 | 0.877375  | 1.493157  | -0.057810 |
| H | -5.216684 | 2.156496  | 0.546931  | 0.126420  |
| H | -4.314752 | 1.792411  | -1.739925 | 0.112410  |
| H | -2.366461 | 0.304423  | -2.088476 | 0.100070  |
| H | -2.221456 | -0.473922 | 2.160145  | 0.124110  |
| H | -4.161517 | 1.028341  | 2.495100  | 0.117960  |
| H | 0.116422  | -2.853362 | -1.116516 | 0.104660  |
| C | 0.130535  | -3.025474 | 1.067055  | 0.478800  |
| O | 1.221007  | -3.547045 | 1.173880  | -0.480060 |
| C | 1.522613  | 1.932359  | -0.021467 | 0.427520  |
| C | 2.560042  | 0.901202  | -0.089582 | 0.124310  |
| C | 2.963554  | -1.370847 | -0.142053 | 0.184090  |
| O | 1.863865  | 3.210340  | 0.044963  | -0.356820 |
| C | 3.910905  | 1.203098  | -0.125689 | -0.135410 |
| C | 4.821970  | 0.148289  | -0.179574 | 0.050480  |
| C | 4.341783  | -1.151746 | -0.185129 | -0.182880 |
| C | 0.619146  | 3.965597  | 0.110901  | 0.174370  |
| C | -0.482342 | 2.889054  | 0.081630  | 0.150040  |
| H | 4.233738  | 2.241403  | -0.109627 | 0.130640  |
| H | 5.891023  | 0.347123  | -0.209873 | 0.122800  |
| H | 0.646569  | 4.553404  | 1.032530  | 0.063260  |
| H | 0.606216  | 4.638820  | -0.750775 | 0.063630  |
| H | -1.154181 | 2.984218  | -0.780245 | -0.007800 |
| H | 5.014708  | -2.004882 | -0.214866 | 0.153430  |
| H | 2.556407  | -2.381699 | -0.108105 | 0.095970  |
| H | -1.104894 | 2.875547  | 0.985514  | 0.004260  |
| H | -0.524307 | -2.870859 | 1.958174  | 0.008960  |
| H | -2.388797 | -2.423184 | 0.601180  | 0.052840  |
| C | -2.531830 | -2.496993 | -1.594737 | -0.126450 |
| H | -3.536385 | -2.064851 | -1.602343 | 0.022770  |
| H | -1.967780 | -2.123384 | -2.458211 | 0.079130  |
| H | -2.631804 | -3.585977 | -1.716437 | 0.098820  |

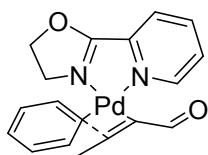

TS 9.

Gibbs Free Energy: -1082.888104 (Hartrees)

Imaginary Frequency: -283.19 cm<sup>-1</sup>

Cartesian coordinates and point charges:

|    |           |           |           |           |
|----|-----------|-----------|-----------|-----------|
| Pd | -0.103953 | -0.424806 | -0.182276 | -0.379290 |
| C  | -0.529811 | -2.469650 | -0.504663 | -0.052520 |
| C  | -1.880634 | -2.080158 | -0.708020 | 0.001970  |
| C  | -2.129243 | -0.013118 | -0.148082 | 0.525530  |
| N  | 0.383818  | 1.646950  | 0.019395  | -0.210930 |
| N  | 2.101631  | -0.445014 | -0.100086 | -0.072030 |
| C  | -2.731444 | 0.622911  | -1.235995 | -0.271090 |
| C  | -4.325603 | 1.645847  | 0.265112  | -0.129120 |
| C  | -3.834987 | 1.449325  | -1.025225 | -0.057140 |
| C  | -2.621187 | 0.178919  | 1.147063  | -0.213460 |
| C  | -3.714535 | 1.016723  | 1.351170  | -0.048520 |
| H  | -5.192747 | 2.283804  | 0.425306  | 0.129490  |
| H  | -4.315413 | 1.935247  | -1.873220 | 0.120000  |
| H  | -2.349943 | 0.471887  | -2.247209 | 0.136930  |
| H  | -2.159901 | -0.329898 | 1.996064  | 0.117930  |
| H  | -4.098478 | 1.169079  | 2.358759  | 0.113330  |
| H  | 0.084514  | -2.654337 | -1.393507 | 0.103230  |
| C  | -0.064947 | -3.147849 | 0.717033  | 0.455070  |
| O  | 1.002734  | -3.725689 | 0.778522  | -0.480150 |
| C  | 1.646752  | 1.874933  | 0.066146  | 0.462330  |
| C  | 2.634299  | 0.796085  | -0.003902 | 0.100660  |
| C  | 2.930365  | -1.487878 | -0.153814 | 0.168340  |
| O  | 2.047606  | 3.131441  | 0.186541  | -0.379270 |
| C  | 3.998204  | 1.032200  | 0.033978  | -0.129770 |
| C  | 4.859288  | -0.063265 | -0.030277 | 0.044860  |
| C  | 4.318383  | -1.336066 | -0.123164 | -0.175890 |
| C  | 0.840087  | 3.942410  | 0.271553  | 0.240340  |
| C  | -0.310336 | 2.931562  | 0.105616  | 0.057890  |
| H  | 4.369825  | 2.051089  | 0.113758  | 0.130880  |
| H  | 5.936911  | 0.082688  | -0.003016 | 0.123050  |
| H  | 0.856811  | 4.440927  | 1.245076  | 0.053200  |
| H  | 0.898055  | 4.691044  | -0.522842 | 0.049920  |
| H  | -0.899146 | 3.096362  | -0.805555 | 0.033360  |
| H  | 4.950854  | -2.219161 | -0.165694 | 0.152140  |
| H  | 2.472968  | -2.477245 | -0.198207 | 0.098550  |
| H  | -1.005804 | 2.923135  | 0.953952  | 0.011260  |
| H  | -2.125535 | -1.859936 | -1.748642 | 0.103370  |
| H  | -0.724448 | -3.086045 | 1.611198  | 0.024470  |
| C  | -3.035379 | -2.611606 | 0.086604  | -0.169840 |
| H  | -3.953660 | -2.051969 | -0.119846 | 0.032610  |
| H  | -3.192594 | -3.653891 | -0.231749 | 0.114000  |
| H  | -2.866903 | -2.619241 | 1.167611  | 0.064260  |

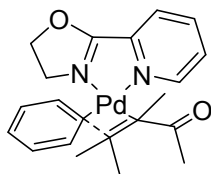

TS 10.

Gibbs Free Energy: -1200.665558 (Hartrees)

Imaginary Frequency: -303.83  $\text{cm}^{-1}$

Cartesian coordinates and point charges:

|    |           |           |           |           |
|----|-----------|-----------|-----------|-----------|
| Pd | -0.071803 | -0.163110 | -0.098565 | -0.536860 |
| C  | -0.743027 | -2.147678 | -0.364699 | 0.342080  |
| C  | -2.111811 | -1.735908 | -0.140846 | -0.109050 |
| C  | -2.066002 | 0.413409  | -0.053849 | 0.532070  |
| N  | 0.639955  | 1.871094  | 0.079099  | -0.146340 |
| N  | 2.170668  | -0.376776 | -0.135495 | -0.082490 |
| C  | -2.488875 | 1.026069  | -1.241128 | -0.215650 |
| C  | -3.895342 | 2.527746  | 0.023554  | -0.132490 |
| C  | -3.398504 | 2.079260  | -1.200928 | -0.058650 |
| C  | -2.549907 | 0.883410  | 1.171474  | -0.221050 |
| C  | -3.464839 | 1.934156  | 1.208978  | -0.060350 |
| H  | -4.621755 | 3.337960  | 0.052888  | 0.130310  |
| H  | -3.726741 | 2.544638  | -2.129266 | 0.108790  |
| H  | -2.111293 | 0.683727  | -2.205540 | 0.138840  |
| H  | -2.220240 | 0.432296  | 2.107630  | 0.128790  |
| H  | -3.844363 | 2.285721  | 2.167391  | 0.111920  |
| C  | 0.051697  | -2.875914 | 0.694478  | 0.456350  |
| O  | 0.786328  | -3.781909 | 0.332172  | -0.499750 |
| C  | 1.917140  | 1.979080  | 0.052199  | 0.398710  |
| C  | 2.803376  | 0.817579  | -0.061894 | 0.150140  |
| C  | 2.921827  | -1.474715 | -0.232932 | 0.151680  |
| O  | 2.444357  | 3.194739  | 0.132628  | -0.362840 |
| C  | 4.183512  | 0.947564  | -0.085960 | -0.151860 |
| C  | 4.957192  | -0.207103 | -0.190489 | 0.050850  |
| C  | 4.316123  | -1.433980 | -0.263904 | -0.183030 |
| C  | 1.327100  | 4.117279  | 0.273413  | 0.186140  |
| C  | 0.079966  | 3.218286  | 0.185240  | 0.110020  |
| H  | 4.633346  | 1.935455  | -0.020828 | 0.131430  |
| H  | 6.042772  | -0.141756 | -0.211759 | 0.123210  |
| H  | 1.444331  | 4.618968  | 1.238683  | 0.058100  |
| H  | 1.409937  | 4.852633  | -0.531325 | 0.062070  |
| H  | -0.544958 | 3.427591  | -0.692693 | 0.008400  |
| H  | 4.874192  | -2.363638 | -0.342323 | 0.149150  |
| H  | 2.400407  | -2.431359 | -0.277364 | 0.114940  |
| H  | -0.563209 | 3.285129  | 1.071307  | 0.002240  |
| C  | -2.811636 | -2.052341 | 1.157829  | -0.218150 |
| H  | -3.801786 | -1.586011 | 1.188938  | 0.077480  |
| H  | -2.959964 | -3.143818 | 1.191543  | 0.115600  |
| H  | -2.272102 | -1.770801 | 2.061881  | 0.062330  |

|   |           |           |           |           |
|---|-----------|-----------|-----------|-----------|
| C | -3.074168 | -1.869383 | -1.293574 | -0.111220 |
| H | -4.017024 | -1.352512 | -1.084832 | 0.036740  |
| H | -2.689981 | -1.524782 | -2.255172 | 0.033900  |
| H | -3.294829 | -2.944591 | -1.400778 | 0.108640  |
| C | 0.062436  | -2.481481 | 2.151997  | -0.212250 |
| H | 1.084727  | -2.625408 | 2.520837  | 0.068250  |
| H | -0.244372 | -1.445564 | 2.339962  | 0.071320  |
| H | -0.580248 | -3.157125 | 2.732713  | 0.104380  |
| C | -0.337500 | -2.536059 | -1.770940 | -0.352830 |
| H | 0.743539  | -2.678543 | -1.846584 | 0.089930  |
| H | -0.798329 | -3.492209 | -2.063492 | 0.102040  |
| H | -0.631483 | -1.781458 | -2.509547 | 0.138020  |

**Table S2: TSFF Parameters added to the Standard MM3 Force Field**

C Carbonyl bond OPT

9 Pd.C2-C2=O2

-2

1 3 4            1.2080 12.5120 2.7884

1 2 3            1.5000 4.6494 -0.1043

-3

C Palladium 1,4-conj\_add OPT

9 N2.Pd-C2.C2=C2.2

-2

2 H1 4 H1        114.7060 0.3167

2 H1 4 C0        116.4597 0.7008

2 C0 4 C0        111.5649 1.6814

2 H1 5 H1        116.1335 0.4271

2 H1 5 C0        116.4352 0.6303

2 C0 5 C0        113.6399 1.1304

-3

C Palladium 1,4-conj\_add OPT

9 N2.Pd(-C2.C2=C2.2)(.N2)

-2

aA 1 2 3        180.0000 45.0000

1 AA 3            1.4008 4.0520 -0.5205

1 C0 4            1.4986 4.6388 0.3874

1 H1 4            1.0887 5.6177 0.5626

1 C3 5            1.4919 5.4066 -0.6529

1 H1 5            1.0940 5.3908 0.7706

1 2 3            2.0808 2.0591 -3.0514

1 2 5            2.1051 1.8988 -3.1035

1 3 4            2.1200 2.2151 -0.5741

1 4 5            1.4186 5.6388 0.6100

2 1 2 3          93.4906 0.0381

a2 1 2 3        171.7862 0.6146

2 1 2 5        174.5624 0.1644

a2 1 2 5        96.8402 0.8644

|             |          |        |         |
|-------------|----------|--------|---------|
| 2 1 2 6     | 76.4398  | 2.7049 |         |
| 2 3 2 5     | 91.3167  | 0.7108 |         |
| 2 2 3 00    | 115.9518 | 1.0480 |         |
| 2 4 3 00    | 111.8124 | 0.9574 |         |
| 2 2 3 4     | 68.0653  | 0.3880 |         |
| 2 3 4 5     | 113.6471 | 0.0397 |         |
| 2 3 4 H1    | 88.6724  | 0.5462 |         |
| 2 3 4 C0    | 99.7976  | 1.2805 |         |
| 2 5 4 H1    | 116.9272 | 0.6223 |         |
| 2 5 4 C3    | 121.7670 | 0.4535 |         |
| 2 2 5 4     | 83.9894  | 0.0347 |         |
| 2 2 5 H1    | 104.4516 | 0.3705 |         |
| 2 2 5 C0    | 101.6436 | 1.3981 |         |
| 4 00 00 3 2 | 0.0000   | 0.0000 | 0.0000  |
| 4 00 00 3 4 | 0.0000   | 0.0000 | 0.0000  |
| 4 00 00 4 3 | 0.0000   | 0.0000 | 0.0000  |
| 4 C0 1 2 3  | 0.0000   | 5.8459 | 0.0000  |
| a4 C0 1 2 3 | 0.0000   | 0.0000 | 0.0000  |
| 4 00 1 2 5  | 0.0000   | 0.0000 | 0.0000  |
| a4 00 1 2 5 | 0.0000   | 2.3843 | 0.0000  |
| 4 C0 1 2 5  | 0.0000   | 0.0000 | 0.0000  |
| a4 C0 1 2 5 | 0.0000   | 0.1258 | 0.0000  |
| 4 00 1 2 6  | 0.0000   | 0.0000 | 0.0000  |
| 4 1 2 3 00  | 0.0000   | 0.4832 | 0.0000  |
| a4 1 2 3 00 | 0.0000   | 0.0000 | 0.0000  |
| 4 1 2 3 4   | 0.0000   | 2.0523 | 0.0000  |
| a4 1 2 3 4  | 0.0000   | 0.0000 | 0.0000  |
| 4 5 2 3 00  | 0.0000   | 0.0000 | 0.0000  |
| 4 5 2 3 4   | 0.0000   | 1.8405 | 0.0000  |
| 4 1 2 5 00  | 0.0000   | 0.0000 | 0.0000  |
| a4 1 2 5 00 | 0.0000   | 0.0000 | 0.0000  |
| 4 1 2 5 4   | 0.0000   | 0.0000 | 0.0000  |
| a4 1 2 5 4  | 0.0000   | 1.9308 | -0.9674 |
| 4 1 2 5 H1  | 0.0000   | 0.0000 | 0.0000  |
| a4 1 2 5 H1 | 0.0000   | 0.5019 | 0.0000  |
| 4 1 2 5 C0  | 0.0000   | 0.0000 | 0.0000  |
| a4 1 2 5 C0 | 0.0000   | 0.0000 | 0.8621  |
| 4 3 2 5 00  | 0.0000   | 0.0000 | 0.0000  |
| 4 3 2 5 4   | 0.0000   | 0.0000 | 0.0000  |
| 4 3 2 5 H1  | 0.0000   | 0.0000 | 0.0000  |
| 4 3 2 5 C0  | 0.0000   | 0.0000 | 0.0000  |
| 4 00 3 4 5  | 0.0000   | 0.0000 | 0.0000  |
| 4 00 3 4 H1 | 0.0000   | 0.0000 | 0.0000  |
| 4 00 3 4 C3 | 0.0000   | 0.0000 | 0.0000  |
| 4 2 3 4 5   | 0.0000   | 2.6837 | 0.0000  |
| 4 2 3 4 H1  | 0.0000   | 0.0000 | 0.0000  |
| 4 2 3 4 C3  | 0.0000   | 0.0000 | 0.0000  |
| 4 C0 4 5 C0 | 0.0000   | 3.3284 | 0.0000  |

|              |        |        |        |
|--------------|--------|--------|--------|
| 4 C0 4 5 H1  | 0.0000 | 0.0000 | 0.0000 |
| 4 H1 4 5 C0  | 0.0000 | 0.0000 | 0.0000 |
| 4 H1 4 5 H1  | 0.0000 | 0.0000 | 0.0000 |
| 4 3 4 5 2    | 0.0000 | 0.0000 | 0.0000 |
| 4 3 4 5 H1   | 0.0000 | 0.0000 | 0.0000 |
| 4 3 4 5 C0   | 0.0000 | 0.0000 | 0.0000 |
| 4 00 4 5 2   | 0.0000 | 0.0000 | 0.0000 |
| 4 C0 4 5 2   | 0.0000 | 0.0000 | 0.0000 |
| 4 C0 4 C3 C0 | 0.0000 | 0.0000 | 0.0000 |
| 4 C0 4 C3 O3 | 0.0000 | 0.0000 | 0.0000 |
| 4 C0 4 C3 H1 | 0.0000 | 0.0000 | 0.0000 |
| 4 H1 4 C3 C0 | 0.0000 | 0.0000 | 0.0000 |
| 4 H1 4 C3 O3 | 0.0000 | 0.0000 | 0.0000 |
| 4 H1 4 C3 H1 | 0.0000 | 0.0000 | 0.0000 |
| 4 3 4 C3 C0  | 0.0000 | 0.0000 | 0.0000 |
| 4 3 4 C3 O3  | 0.0000 | 0.0000 | 0.0000 |
| 4 3 4 C3 H1  | 0.0000 | 0.0000 | 0.0000 |
| 4 5 4 C3 C0  | 0.0000 | 0.0000 | 0.0000 |
| 4 5 4 C3 O3  | 0.0000 | 0.0000 | 0.0000 |
| 4 5 4 C3 H1  | 0.0000 | 0.0000 | 0.0000 |
| 4 C0 5 C3 C0 | 0.0000 | 0.0000 | 0.0000 |
| 4 C0 5 C3 O3 | 0.0000 | 0.0000 | 0.0000 |
| 4 C0 5 C3 H1 | 0.0000 | 0.0000 | 0.0000 |
| 4 H1 5 C3 C0 | 0.0000 | 0.0000 | 0.0000 |
| 4 H1 5 C3 O3 | 0.0000 | 0.0000 | 0.0000 |
| 4 H1 5 C3 H1 | 0.0000 | 0.0000 | 0.0000 |
| 4 2 5 C0 C0  | 0.0000 | 0.2597 | 0.0000 |
| 4 2 5 C2 O2  | 0.0000 | 0.1172 | 0.0000 |
| 4 2 5 C0 H1  | 0.0000 | 0.0000 | 0.0000 |
| 4 4 5 C0 C0  | 0.0000 | 3.3193 | 0.1910 |
| 4 4 5 C3 O3  | 0.0000 | 0.0000 | 0.0000 |
| 4 4 5 C3 H1  | 0.0000 | 0.0000 | 0.0000 |
| 4 1 3 5 6    | 0.0000 | 5.9082 | 0.0000 |
| a4 1 3 5 6   | 0.0000 | 5.9474 | 0.0000 |
| 5 3 2 00 00  | 0.0000 | 0.0000 |        |
| 5 5 4 00 00  | 0.0000 | 0.0000 |        |
| 5 4 5 00 00  | 0.0000 | 0.0000 |        |

-3

C Palladium pyridine-extra OPT

9 Pd.N2\*AA

-2

|             |        |        |        |
|-------------|--------|--------|--------|
| 4 AA 2 3 00 | 0.0000 | 1.0955 | 0.0000 |
| 4 1 2 3 00  | 0.0000 | 2.8000 | 0.0000 |

-3

C Palladium pyridine OPT

9 Pd.N2\*AA

-2

|       |        |        |         |
|-------|--------|--------|---------|
| 1 1 2 | 2.2313 | 2.8324 | -4.2389 |
|-------|--------|--------|---------|

|                       |          |        |         |
|-----------------------|----------|--------|---------|
| 1 2 3                 | 1.3367   | 4.5093 | -1.7661 |
| 1 H1 3                | 1.1010   | 4.9903 | 0.3633  |
| 2 1 2 3               | 120.9121 | 0.6009 |         |
| 4 1 2 3 H1            | 0.0000   | 0.9804 | 0.0000  |
| 4 1 2 3 C2            | 0.0000   | 2.9074 | 0.0000  |
| -3                    |          |        |         |
| C Palladium oxazoline |          |        |         |
| 9 Pd.N2=C2-O3-C3-C3-2 |          |        |         |
| -2                    |          |        |         |
| 1 1 2                 | 2.1500   | 2.6731 | -3.3365 |
| 1 2 3                 | 1.2712   | 3.1754 | -1.8439 |
| 1 2 6                 | 1.4724   | 3.5244 | -1.0506 |
| 1 3 4                 | 1.3235   | 3.3790 | 0.0991  |
| 1 3 C2                | 1.4600   | 3.5563 | 0.4945  |
| 1 4 5                 | 1.4373   | 4.9151 | -2.2650 |
| 2 1 2 3               | 114.6086 | 0.0044 |         |
| 2 1 2 6               | 139.7180 | 0.5554 |         |
| 2 3 2 6               | 106.8071 | 1.0023 |         |
| 2 2 3 4               | 118.3343 | 1.5946 |         |
| 2 2 3 C0              | 126.4541 | 0.5074 |         |
| 2 4 3 C0              | 118.5661 | 0.9830 |         |
| 2 3 4 5               | 112.6583 | 0.5091 |         |
| 2 4 5 6               | 104.1000 | 0.6197 |         |
| 4 1 2 3 4             | 0.0000   | 2.5492 | 0.0000  |
| 4 1 2 3 C2            | 0.0000   | 3.6985 | 0.0000  |
| 4 1 2 6 00            | 0.0000   | 0.0000 | 0.0000  |
| 5 2 00 00 00          | 0.0000   | 0.0000 | 0.0000  |
| -3                    |          |        |         |

## Details of Force Field Parameterization

The bond dipoles were the first value parameterized in the force field. The values were optimized using a penalty function only based on the point charge data. After the values were optimized, the point charge values were determined MM and compared to the QM point charge data (Figure S). These values will not be a perfect fit since point charges are not an observable piece of data. Electrostatic fitting methods fit point charges based on the overall charge on the molecule. The MM3 forcefield uses bond dipoles which will give the same point charges for the same type of interaction. This leads to horizontal bands in the graph in which the QM will have different charges for a given type of interaction while MM will give the same point charge.



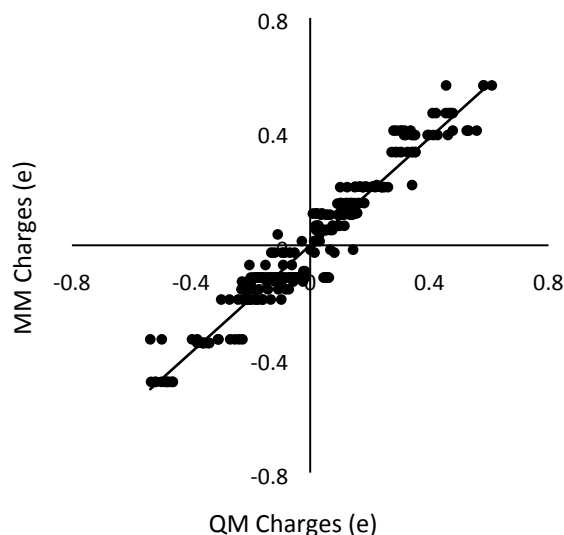

**Figure S1.** Comparison of point charges between QM and MM methods after parameterization of bond dipoles in force field

The next parameter that was optimized was the bond and angle force constants. Since force constants are the second derivative of energy, they are described by fitting to Hessian elements. The MM eigenmatrix is compared to an unmodified QM eigenmatrix. The MM eigenmatrix is diagonalized from the MM Hessian and QM eigenvectors. Once the force constants were parameterized, the bond lengths and angles were compared between the QM and MM structures. These data types showed good agreement between the QM and MM structures (Figure S). Therefore, the force field is able to accurately reproduce the structural information of the reference structures.

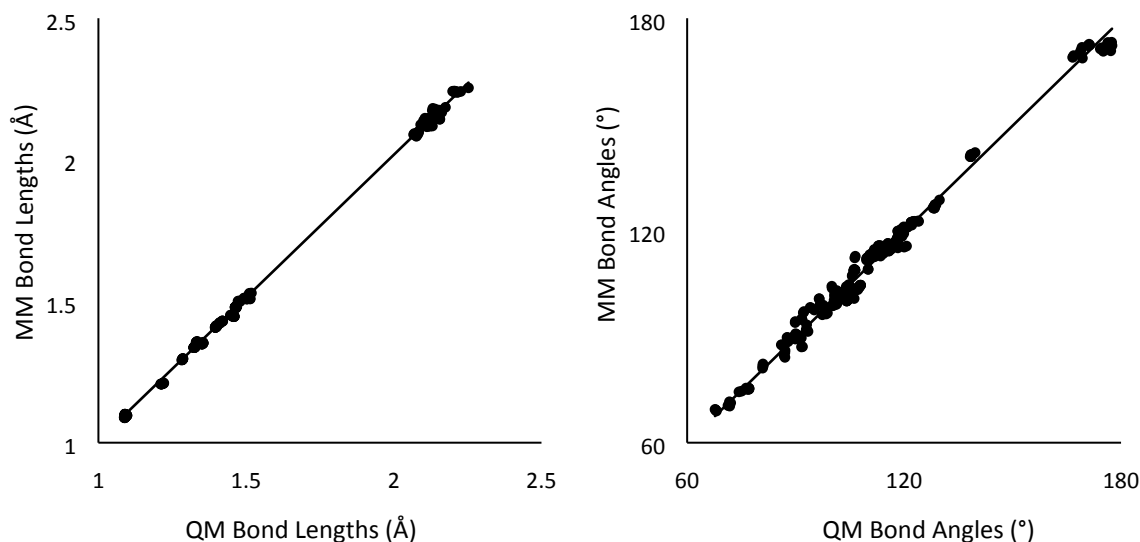

**Figure S2.** Comparison of bond lengths and angles between QM and MM methods after parameterization of the bond and angle force constants.

Torsional parameters are typically the last parameter altered in the force field. Since we are fitting to a TS, only a few torsional terms are parameterized. The torsional terms used in this force field were those need to keep the square planarity around the metal center. All torsional terms that are not parameterized are set to zero. For the TSFF, there was a high linear dependence seen with no significant deviations between

the QM and MM structures (Figure 6). This internal validation showed that the torsions sampled were able to keep the geometry of the TS around the metal center.

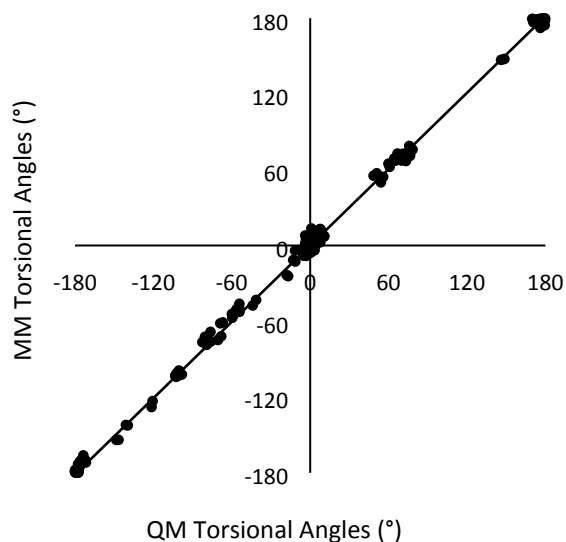

**FigureS3.** Comparison of torsion angles between QM and MM methods after the parametrization of torsional constants

The last internal validation of the force field needed was to test how well it is able to reproduce the Hessian matrix. Since the eigenvectors are the same between the two methods, the diagonal eigenvalues were compared (Figure 6). There was a strong linear dependence between the MM eigenvalues and the QM eigenvalues. This validation, was used to prove that we can accurately reproduce the energies of the structures with the TSFF. With the TSFF able to reproduce the structural and electronic aspects of the QM data, its accuracy underwent an external validation by reproducing structures from the literature.

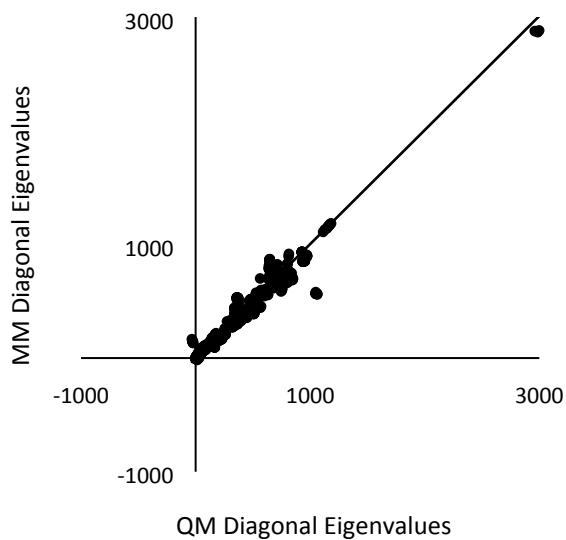

**Figure S4.** Comparison of Hessian diagonal eigenvalues from QM and MM methods after parameterization of all force constants.

**Figure S5: Structures of the Validation Set**

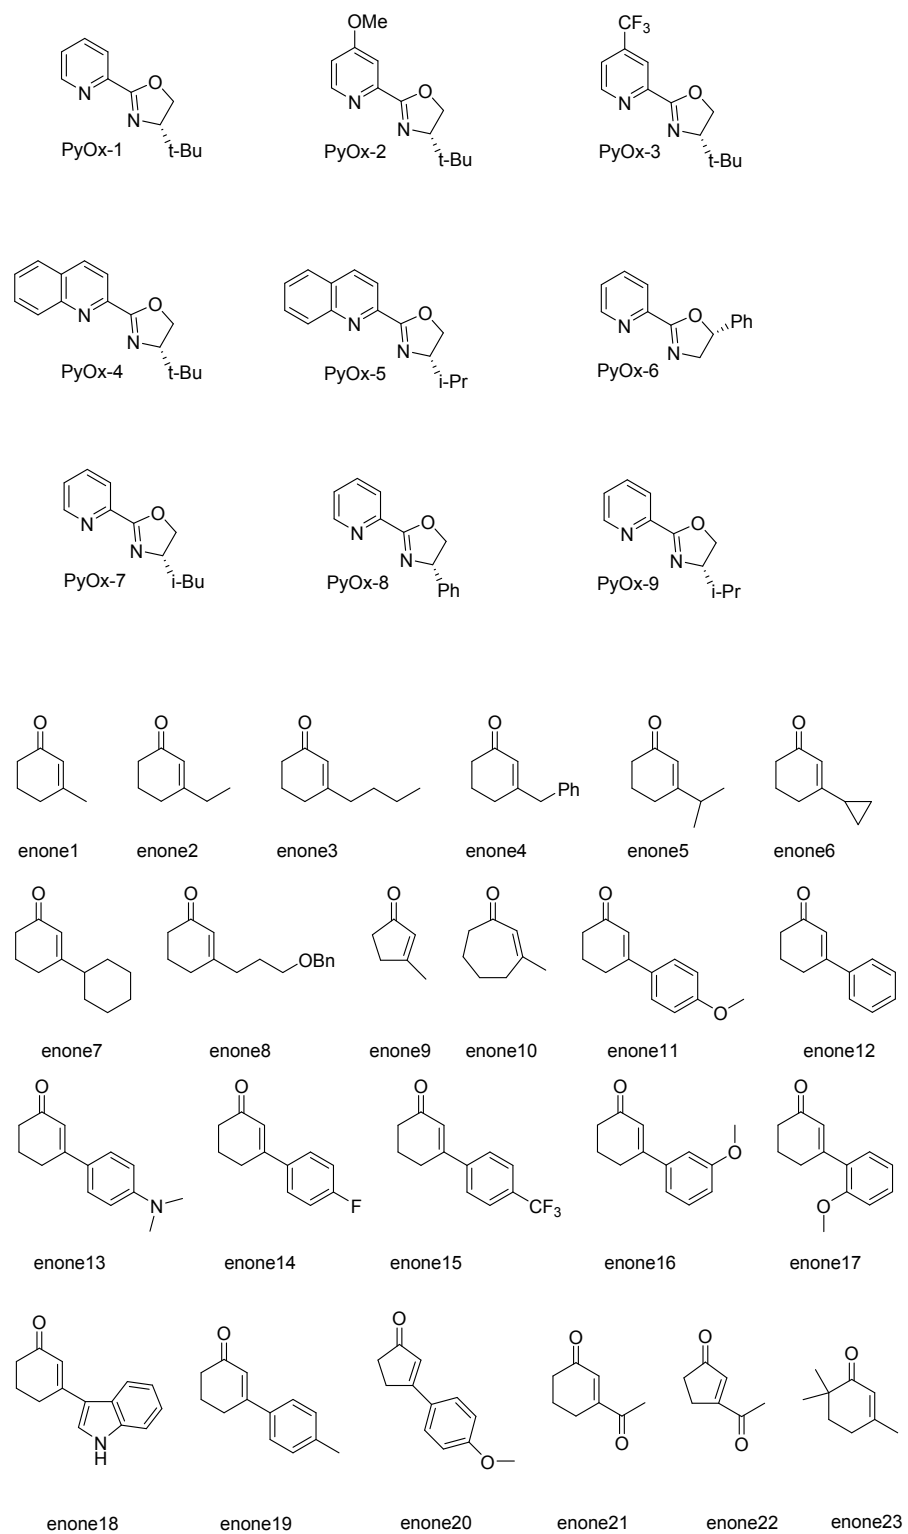

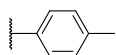

Aryl1

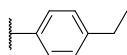

Aryl2

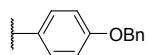

Aryl3

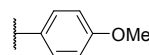

Aryl4

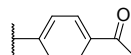

Aryl5

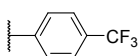

Aryl6

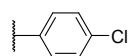

Aryl7

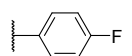

Aryl8

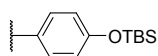

Aryl9

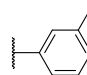

Aryl10

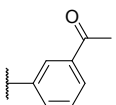

Aryl11

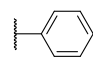

Aryl12

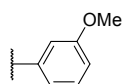

Aryl13

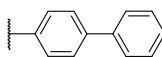

Aryl14

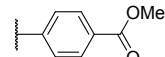

Aryl15

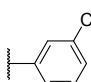

Aryl16

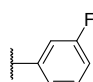

Aryl17

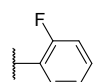

Aryl18

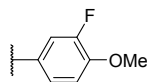

Aryl19

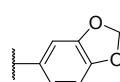

Aryl20

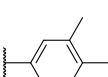

Aryl21

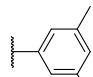

Aryl22

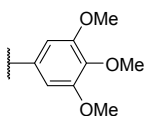

Aryl23

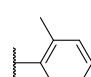

Aryl24

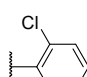

Aryl25

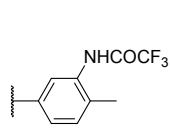

Aryl26

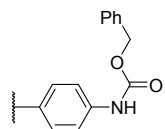

Aryl27

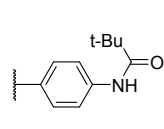

Aryl28

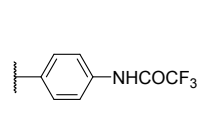

Aryl29

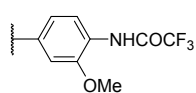

Aryl30

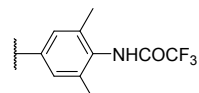

Aryl31

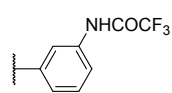

Aryl32

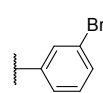

Aryl33

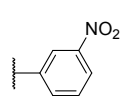

Aryl34

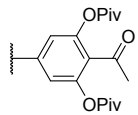

Aryl35

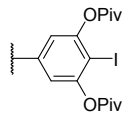

Aryl36

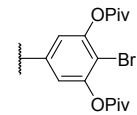

Aryl37

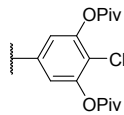

Aryl38

**Table S3: Results for Validation Set**

|          | Ligand | enone   | aryl   | Abs. Conf. | temp (K) | % ee (exp.) | ln(er) (exp.) | ln(er) (calc.) |
|----------|--------|---------|--------|------------|----------|-------------|---------------|----------------|
| enone001 | PyOx-1 | enone1  | aryl12 | R          | 333      | 93          | 3.32          | 2.69           |
| enone002 | PyOx-2 | enone1  | aryl12 | R          | 333      | 78          | 2.09          | 2.67           |
| enone003 | PyOx-3 | enone1  | aryl12 | R          | 333      | 81          | 2.25          | 2.52           |
| enone004 | PyOx-4 | enone1  | aryl12 | R          | 333      | 20          | 0.41          | 0.57           |
| enone005 | PyOx-5 | enone1  | aryl12 | R          | 333      | 0           | 0.00          | -0.09          |
| enone006 | PyOx-6 | enone1  | aryl12 | R          | 333      | 2           | 0.04          | 0.06           |
| enone007 | PyOx-7 | enone1  | aryl12 | R          | 333      | 24          | 0.49          | 0.92           |
| enone008 | PyOx-8 | enone1  | aryl12 | R          | 333      | 52          | 1.15          | 3.08           |
| enone009 | PyOx-9 | enone1  | aryl12 | R          | 333      | 40          | 0.85          | 1.45           |
| enone010 | PyOx-1 | enone1  | aryl1  | R          | 333      | 87          | 2.67          | 2.62           |
| enone011 | PyOx-1 | enone1  | aryl2  | R          | 333      | 85          | 2.51          | 2.50           |
| enone012 | PyOx-1 | enone1  | aryl3  | R          | 333      | 74          | 1.90          | 2.74           |
| enone013 | PyOx-1 | enone1  | aryl4  | R          | 333      | 69          | 1.70          | 2.55           |
| enone014 | PyOx-1 | enone1  | aryl5  | R          | 333      | 96          | 3.89          | 1.87           |
| enone015 | PyOx-1 | enone1  | aryl6  | R          | 333      | 96          | 3.89          | 2.09           |
| enone016 | PyOx-1 | enone1  | aryl7  | R          | 333      | 95          | 3.66          | 2.11           |
| enone017 | PyOx-1 | enone1  | aryl8  | R          | 333      | 92          | 3.18          | 2.27           |
| enone018 | PyOx-1 | enone1  | aryl9  | R          | 333      | 82          | 2.31          | 3.04           |
| enone019 | PyOx-1 | enone1  | aryl10 | R          | 333      | 91          | 3.06          | 2.59           |
| enone020 | PyOx-1 | enone1  | aryl11 | R          | 333      | 95          | 3.66          | 2.24           |
| enone021 | PyOx-1 | enone2  | aryl12 | R          | 333      | 92          | 3.18          | 3.08           |
| enone022 | PyOx-1 | enone3  | aryl12 | R          | 333      | 91          | 3.06          | 3.19           |
| enone023 | PyOx-1 | enone4  | aryl12 | R          | 333      | 91          | 3.06          | 2.60           |
| enone024 | PyOx-1 | enone5  | aryl12 | R          | 333      | 79          | 2.14          | 2.03           |
| enone025 | PyOx-1 | enone6  | aryl12 | R          | 333      | 88          | 2.75          | 2.42           |
| enone026 | PyOx-1 | enone7  | aryl12 | R          | 333      | 85          | 2.51          | 1.93           |
| enone027 | PyOx-1 | enone8  | aryl12 | R          | 333      | 91          | 3.06          | 3.57           |
| enone028 | PyOx-1 | enone9  | aryl12 | R          | 333      | 91          | 3.06          | 2.63           |
| enone029 | PyOx-1 | enone10 | aryl12 | R          | 333      | 93          | 3.32          | 3.97           |
| enone030 | PyOX-1 | enone11 | aryl1  | S          | 353      | -87         | -2.67         | -2.90          |
| enone031 | PyOx-1 | enone11 | aryl12 | S          | 353      | -87         | -2.67         | -2.97          |
| enone032 | PyOx-1 | enone11 | aryl14 | S          | 353      | -90         | -2.94         | -2.41          |
| enone033 | PyOx-1 | enone11 | aryl7  | R          | 353      | 83          | 2.38          | 2.38           |
| enone034 | PyOx-1 | enone11 | aryl8  | R          | 353      | 91          | 3.06          | 2.57           |
| enone035 | PyOx-1 | enone11 | aryl15 | S          | 353      | -87         | -2.67         | -2.29          |
| enone036 | PyOx-1 | enone11 | aryl6  | S          | 353      | -82         | -2.31         | -2.31          |
| enone037 | PyOx-1 | enone11 | aryl10 | R          | 353      | 90          | 2.94          | 2.87           |
| enone038 | PyOx-1 | enone11 | aryl13 | R          | 353      | 90          | 2.94          | 2.73           |
| enone039 | PyOx-1 | enone11 | aryl16 | R          | 353      | 85          | 2.51          | 2.20           |

|          |        |         |        |   |     |     |       |       |
|----------|--------|---------|--------|---|-----|-----|-------|-------|
| enone040 | PyOx-1 | enone11 | aryl17 | R | 353 | 84  | 2.44  | 2.34  |
| enone041 | PyOx-1 | enone11 | aryl18 | R | 353 | 81  | 2.25  | 1.90  |
| enone042 | PyOx-1 | enone11 | aryl19 | R | 353 | 88  | 2.75  | 2.15  |
| enone043 | PyOx-1 | enone11 | aryl20 | R | 353 | 90  | 2.94  | 2.55  |
| enone044 | PyOx-1 | enone11 | aryl21 | R | 353 | 85  | 2.51  | 2.79  |
| enone045 | PyOx-1 | enone11 | aryl22 | R | 353 | 90  | 2.94  | 2.80  |
| enone046 | PyOx-1 | enone11 | aryl23 | R | 353 | 78  | 2.09  | 2.46  |
| enone047 | PyOx-1 | enone12 | aryl1  | R | 353 | 87  | 2.67  | 2.83  |
| enone048 | PyOx-1 | enone13 | aryl1  | S | 353 | -91 | -3.06 | -2.97 |
| enone049 | PyOx-1 | enone14 | aryl1  | S | 353 | -89 | -2.84 | -2.79 |
| enone050 | PyOx-1 | enone15 | aryl1  | S | 353 | -90 | -2.94 | -2.78 |
| enone051 | PyOx-1 | enone16 | aryl1  | S | 353 | -93 | -3.32 | -2.98 |
| enone052 | PyOx-1 | enone17 | aryl1  | S | 353 | -80 | -2.20 | -2.51 |
| enone053 | PyOx-1 | enone18 | aryl1  | S | 353 | -77 | -2.04 | -3.60 |
| enone054 | PyOx-1 | enone12 | aryl10 | R | 353 | 88  | 2.75  | 2.86  |
| enone055 | PyOx-1 | enone19 | aryl12 | S | 353 | -88 | -2.75 | -3.00 |
| enone056 | PyOx-1 | enone12 | aryl4  | R | 353 | 80  | 2.20  | 2.77  |
| enone057 | PyOx-1 | enone20 | aryl1  | S | 353 | -87 | -2.67 | -2.85 |
| enone058 | PyOX-1 | enone21 | aryl7  | S | 333 | -96 | -3.89 | -2.24 |
| enone059 | PyOx-1 | enone21 | aryl8  | S | 333 | -90 | -2.94 | -2.41 |
| enone060 | PyOX-1 | enone21 | aryl10 | S | 333 | -92 | -3.18 | -2.61 |
| enone061 | PyOX-1 | enone21 | aryl26 | S | 333 | -91 | -3.06 | -1.37 |
| enone062 | PyOX-1 | enone22 | aryl12 | S | 333 | -93 | -3.32 | -2.63 |
| enone063 | PyOX-1 | enone22 | aryl10 | S | 333 | -90 | -2.94 | -2.48 |
| enone064 | PyOX-1 | enone22 | aryl8  | S | 333 | -92 | -3.18 | -2.32 |
| enone065 | PyOX-1 | enone1  | aryl27 | R | 333 | 76  | 1.99  | 1.80  |
| enone066 | PyOX-1 | enone1  | aryl28 | R | 333 | 78  | 2.09  | 2.44  |
| enone067 | PyOX-1 | enone1  | aryl29 | R | 333 | 89  | 2.84  | 2.75  |
| enone068 | PyOX-1 | enone1  | aryl30 | R | 333 | 88  | 2.75  | 2.16  |
| enone069 | PyOX-1 | enone1  | aryl31 | R | 333 | 90  | 2.94  | 3.60  |
| enone070 | PyOX-1 | enone1  | aryl32 | R | 333 | 92  | 3.18  | 0.51  |
| enone071 | PyOX-1 | enone1  | aryl26 | R | 333 | 88  | 2.75  | 1.43  |
| enone072 | PyOX-1 | enone1  | aryl25 | R | 333 | 37  | 0.78  | 1.41  |
| enone073 | PyOX-1 | enone1  | aryl24 | R | 333 | 22  | 0.45  | 2.18  |
| enone074 | PyOx-1 | enone1  | aryl16 | R | 333 | 97  | 4.18  | 1.76  |
| enone075 | PyOx-1 | enone1  | aryl33 | R | 333 | 86  | 2.59  | 1.69  |
| enone076 | PyOx-1 | enone1  | aryl34 | R | 333 | 77  | 2.04  | 1.04  |
| enone077 | PyOx-1 | enone1  | aryl18 | R | 333 | 77  | 2.04  | 1.81  |
| enone078 | PyOx-1 | enone1  | aryl35 | R | 323 | 94  | 3.48  | 3.60  |
| enone079 | PyOx-1 | enone1  | aryl36 | R | 323 | 92  | 3.18  | 3.64  |
| enone080 | PyOx-1 | enone1  | aryl37 | R | 323 | 99  | 5.29  | 3.68  |
| enone081 | PyOx-1 | enone1  | aryl38 | R | 323 | 99  | 5.29  | 3.66  |
| enone082 | PyOx-1 | enone23 | aryl12 | R | 333 | 90  | 3.04  | 1.56  |

**Figure S6: Structures in Ligand Screen**

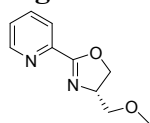

PyOx-10

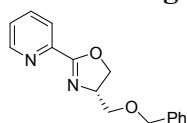

PyOx-11

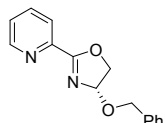

PyOx-12

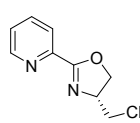

PyOx-13

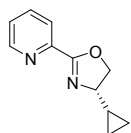

PyOx-14

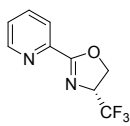

PyOx-15

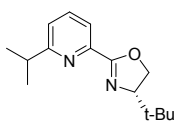

PyOx-16

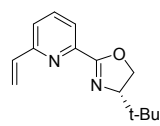

PyOx-17

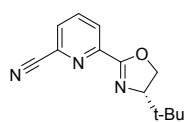

PyOx-18

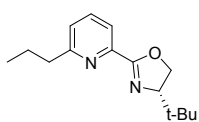

PyOx-19

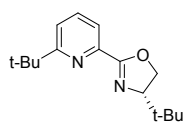

PyOx-20

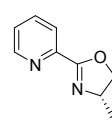

PyOx-21

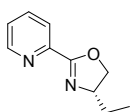

PyOx-22

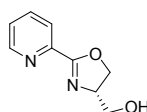

PyOx-23

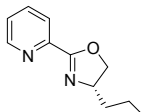

PyOx-24

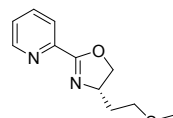

PyOx-25

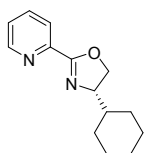

PyOx-26

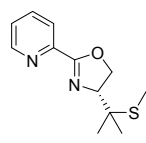

PyOx-27

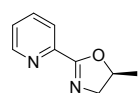

PyOx-28

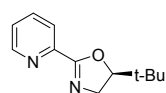

PyOx-29

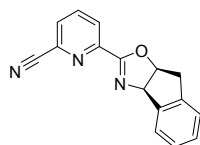

PyOx-30

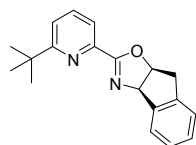

PyOx-31

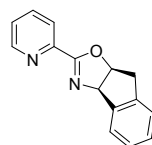

PyOx-32

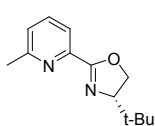

PyOx-33

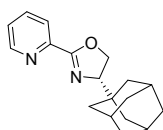

PyOx-34

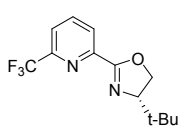

PyOx-35

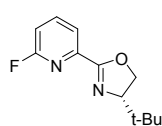

PyOx-36

**Table S4: Results for Ligand Screen**

|          | Ligand | Enone  | Aryl   | Abs. Conf. | Temp. (K) | ee (calc.) | ln(er) (calc.) |
|----------|--------|--------|--------|------------|-----------|------------|----------------|
| enone082 | PyOx10 | enone1 | aryl12 | R          | 333       | 56.8       | 1.29           |
| enone083 | PyOx11 | enone1 | aryl12 | R          | 333       | 58.1       | 1.33           |
| enone084 | PyOx12 | enone1 | aryl12 | R          | 333       | 94.3       | 3.53           |
| enone085 | PyOx13 | enone1 | aryl12 | R          | 333       | 69.2       | 1.70           |
| enone086 | PyOx14 | enone1 | aryl12 | R          | 333       | 64.8       | 1.54           |
| enone087 | PyOx15 | enone1 | aryl12 | R          | 333       | 91         | 3.06           |
| enone088 | PyOx16 | enone1 | aryl12 | R          | 333       | 33.4       | 0.69           |
| enone089 | PyOx17 | enone1 | aryl12 | S          | 333       | -71.5      | -1.79          |
| enone090 | PyOx18 | enone1 | aryl12 | S          | 333       | -98.9      | -5.20          |
| enone091 | PyOx19 | enone1 | aryl12 | S          | 333       | -30.5      | -0.63          |
| enone092 | PyOx20 | enone1 | aryl12 | S          | 333       | -99.9      | -7.60          |
| enone093 | PyOx21 | enone1 | aryl12 | R          | 333       | 32.1       | 0.67           |
| enone094 | PyOx22 | enone1 | aryl12 | R          | 333       | 54.1       | 1.21           |
| enone095 | PyOx23 | enone1 | aryl12 | R          | 333       | 49.7       | 1.09           |
| enone096 | PyOx24 | enone1 | aryl12 | R          | 333       | 48.5       | 1.06           |
| enone097 | PyOx25 | enone1 | aryl12 | R          | 333       | 65.5       | 1.57           |
| enone098 | PyOx26 | enone1 | aryl12 | R          | 333       | 46.4       | 1.00           |
| enone099 | PyOx27 | enone1 | aryl12 | R          | 333       | 89.9       | 2.93           |
| enone100 | PyOx28 | enone1 | aryl12 | S          | 333       | -14.1      | -0.28          |
| enone101 | PyOx29 | enone1 | aryl12 | R          | 333       | 2.8        | 0.06           |
| enone102 | PyOx30 | enone1 | aryl12 | R          | 333       | 99.6       | 6.21           |
| enone103 | PyOx31 | enone1 | aryl12 | R          | 333       | 99.9       | 7.60           |
| enone104 | PyOx32 | enone1 | aryl12 | S          | 333       | -61.2      | -1.42          |
| enone105 | PyOx33 | enone1 | aryl12 | R          | 333       | 20.8       | 0.42           |
| enone106 | PyOx34 | enone1 | aryl12 | R          | 333       | 76.2       | 2.00           |
| enone107 | PyOx35 | enone1 | aryl12 | S          | 333       | -87.6      | -2.72          |
| enone108 | PyOx36 | enone1 | aryl12 | R          | 333       | 6.7        | 0.13           |

**Table S5 Coordinates of the 4 TS catalyzed by the PyrOx ligand containing a t-Bu group in the 6 position(enone092) optimized by MM****TS A**

FF Calculated Energy: 508.58 kJ/mol

|    |           |           |           |
|----|-----------|-----------|-----------|
| Pd | -0.361842 | 0.879731  | 0.195272  |
| C  | -1.968645 | 0.563009  | -1.163812 |
| C  | -2.849828 | 1.513574  | -0.568412 |
| C  | -1.838233 | 1.928898  | 1.321041  |
| N  | 1.549718  | 0.437077  | 1.370293  |
| N  | 1.015808  | -0.022882 | -1.223745 |
| C  | -4.235741 | 1.096739  | -0.099207 |
| C  | -1.681866 | 3.323018  | 1.483518  |



|   |           |           |           |
|---|-----------|-----------|-----------|
| C | -2.856886 | 3.226535  | 3.594444  |
| C | -2.212748 | 3.967278  | 2.602737  |
| C | -2.419619 | 1.186963  | 2.375217  |
| C | -2.948670 | 1.838083  | 3.491693  |
| H | -3.272378 | 3.739756  | 4.479570  |
| H | -2.118882 | 5.062775  | 2.710320  |
| H | -1.169294 | 3.914025  | 0.709107  |
| H | -2.465123 | 0.089216  | 2.306983  |
| H | -3.428132 | 1.257970  | 4.300374  |
| H | -4.315664 | 1.114821  | 1.006015  |
| H | -4.995854 | 1.826676  | -0.459961 |
| C | -4.619583 | -0.297506 | -0.612471 |
| H | -4.812893 | -0.251718 | -1.709843 |
| H | -5.572232 | -0.625705 | -0.135777 |
| C | -3.519373 | -1.317946 | -0.335885 |
| H | -3.841392 | -2.320221 | -0.700910 |
| H | -3.346233 | -1.415891 | 0.758819  |
| H | -1.499901 | 0.817593  | -2.118469 |
| C | -2.236819 | -0.912846 | -1.023216 |
| O | -1.458922 | -1.719234 | -1.479738 |
| C | -2.881384 | 2.898625  | -1.184934 |
| H | -3.400621 | 3.638201  | -0.536748 |
| H | -1.858906 | 3.283593  | -1.393068 |
| H | -3.421016 | 2.882348  | -2.158176 |
| C | 1.932704  | -0.715690 | -0.649772 |
| C | 2.266836  | -0.546540 | 0.772461  |
| C | 2.074569  | 0.904753  | 2.567037  |
| O | 2.675222  | -1.507655 | -1.426887 |
| C | 3.208668  | -1.341342 | 1.424760  |
| C | 3.543609  | -1.030787 | 2.733946  |
| C | 3.005543  | 0.128171  | 3.281924  |
| C | 2.027631  | -1.600481 | -2.713464 |
| C | 1.174127  | -0.324842 | -2.676598 |
| H | 3.702391  | -2.182289 | 0.909068  |
| H | 4.290701  | -1.627798 | 3.286721  |
| H | 2.770715  | -1.651306 | -3.532210 |
| H | 1.394639  | -2.513860 | -2.741900 |
| H | 0.181237  | -0.555130 | -3.128189 |
| C | 1.774407  | 0.871569  | -3.445125 |
| C | 3.186937  | 1.238211  | -2.941915 |
| H | 3.605020  | 2.105150  | -3.500049 |
| H | 3.186162  | 1.520567  | -1.866125 |
| H | 3.908607  | 0.401823  | -3.065068 |
| C | 1.843069  | 0.554948  | -4.955561 |
| H | 2.190491  | 1.434407  | -5.541975 |
| H | 2.543929  | -0.276194 | -5.184366 |
| H | 0.848035  | 0.266662  | -5.361442 |
| H | 3.370591  | 0.448487  | 4.270404  |

|   |           |          |           |
|---|-----------|----------|-----------|
| C | 0.863847  | 2.107033 | -3.265206 |
| H | 1.260209  | 2.991973 | -3.810715 |
| H | -0.162371 | 1.923542 | -3.652444 |
| H | 0.768675  | 2.404277 | -2.197651 |
| C | 1.760593  | 2.317513 | 3.055999  |
| C | 1.598737  | 3.272982 | 1.855570  |
| H | 1.299711  | 4.295499 | 2.176180  |
| H | 2.549347  | 3.374406 | 1.285605  |
| H | 0.837729  | 2.924962 | 1.132222  |
| C | 0.507373  | 2.273502 | 3.940515  |
| H | 0.688810  | 1.711440 | 4.883500  |
| H | 0.160118  | 3.290939 | 4.225312  |
| H | -0.322644 | 1.756574 | 3.426411  |
| C | 2.895824  | 2.929008 | 3.917193  |
| H | 2.692319  | 3.996886 | 4.155562  |
| H | 3.021552  | 2.417480 | 4.896032  |
| H | 3.877040  | 2.898827 | 3.392433  |

### TS B

FF Calculated Energy: 534.61 kJ/mol

|    |           |           |           |
|----|-----------|-----------|-----------|
| Pd | 0.327501  | 0.465640  | 0.768308  |
| C  | 2.391576  | -0.075355 | 0.684196  |
| C  | 2.731884  | 1.165165  | 0.055724  |
| C  | 0.965752  | 2.430586  | 0.333621  |
| N  | -1.871138 | 0.539002  | 0.279551  |
| N  | -0.397208 | -1.585303 | 0.937035  |
| C  | 3.823478  | 2.048470  | 0.646694  |
| C  | 0.545910  | 2.971569  | -0.901201 |
| C  | 0.753330  | 5.207284  | -0.006496 |
| C  | 0.475946  | 4.355080  | -1.076655 |
| C  | 1.142278  | 3.302708  | 1.430409  |
| C  | 1.063299  | 4.685293  | 1.250313  |
| H  | 0.691658  | 6.301046  | -0.145952 |
| H  | 0.187794  | 4.778821  | -2.055330 |
| H  | 0.297980  | 2.299668  | -1.737378 |
| H  | 1.373013  | 2.893721  | 2.425302  |
| H  | 1.239153  | 5.368638  | 2.100397  |
| H  | 4.581969  | 2.283934  | -0.134589 |
| H  | 3.419817  | 3.032057  | 0.960056  |
| C  | 4.545443  | 1.395887  | 1.834812  |
| H  | 5.168297  | 2.155595  | 2.361360  |
| H  | 5.248444  | 0.615692  | 1.459222  |
| C  | 3.563603  | 0.754934  | 2.811047  |
| H  | 2.866071  | 1.513422  | 3.227459  |
| H  | 4.122661  | 0.326211  | 3.674236  |
| H  | 2.350661  | -0.987784 | 0.079449  |
| C  | 2.792652  | -0.334347 | 2.108495  |
| O  | 2.576270  | -1.410436 | 2.611112  |

|   |           |           |           |
|---|-----------|-----------|-----------|
| C | 2.819047  | 1.146927  | -1.458666 |
| H | 2.898870  | 2.169286  | -1.889008 |
| H | 3.716342  | 0.580655  | -1.794654 |
| H | 1.936045  | 0.650649  | -1.918248 |
| C | -1.396198 | -1.749025 | 0.133499  |
| C | -2.258166 | -0.625990 | -0.278817 |
| C | -2.803406 | 1.547695  | 0.306724  |
| O | -1.694639 | -3.003703 | -0.213529 |
| C | -3.311094 | -0.722127 | -1.187232 |
| C | -4.095888 | 0.404497  | -1.407042 |
| C | -3.869984 | 1.524778  | -0.609632 |
| C | -0.613885 | -3.850148 | 0.241933  |
| C | -0.045509 | -2.970147 | 1.364300  |
| H | -3.538254 | -1.671909 | -1.700009 |
| H | -4.949734 | 0.371394  | -2.107172 |
| H | -0.983396 | -4.845329 | 0.555096  |
| H | 0.121745  | -3.981958 | -0.581218 |
| H | 1.061506  | -3.092926 | 1.394525  |
| C | -0.626892 | -3.316973 | 2.759776  |
| C | -2.172504 | -3.321368 | 2.776794  |
| H | -2.566852 | -3.579043 | 3.784780  |
| H | -2.596169 | -2.326809 | 2.515809  |
| H | -2.604207 | -4.064674 | 2.072541  |
| C | -0.122637 | -4.707156 | 3.208527  |
| H | -0.455768 | -4.948724 | 4.242342  |
| H | -0.493895 | -5.525306 | 2.554889  |
| H | 0.988580  | -4.763117 | 3.204357  |
| H | -4.591393 | 2.357301  | -0.653351 |
| C | -0.159136 | -2.287713 | 3.812550  |
| H | -0.651740 | -2.455338 | 4.795968  |
| H | 0.933274  | -2.352286 | 3.997189  |
| H | -0.390268 | -1.242390 | 3.510840  |
| C | -2.853816 | 2.531397  | 1.486365  |
| C | -4.287110 | 2.584381  | 2.075543  |
| H | -4.330515 | 3.218259  | 2.989094  |
| H | -5.031107 | 3.010475  | 1.368584  |
| H | -4.648626 | 1.572470  | 2.366207  |
| C | -1.940801 | 2.092780  | 2.650145  |
| H | -2.021067 | 2.781880  | 3.519842  |
| H | -2.198805 | 1.074322  | 3.017495  |
| H | -0.872558 | 2.075617  | 2.364375  |
| C | -2.486346 | 3.951169  | 1.027006  |
| H | -2.484263 | 4.674506  | 1.872226  |
| H | -1.479709 | 3.975794  | 0.571038  |
| H | -3.195678 | 4.339690  | 0.263323  |

### TS C

FF Calculated Energy: 519.01 kJ/mol

|    |           |           |           |
|----|-----------|-----------|-----------|
| Pd | -0.308398 | 0.696295  | -0.001449 |
| C  | -1.542424 | 0.883425  | -1.741115 |
| C  | -1.774497 | 2.261595  | -1.432499 |
| C  | -0.377555 | 2.796932  | 0.147871  |
| N  | 0.322074  | 0.018352  | 1.989019  |
| N  | 0.260183  | -1.467404 | -0.301379 |
| C  | -3.114070 | 2.641107  | -0.828615 |
| C  | 0.793763  | 3.419386  | -0.342973 |
| C  | 0.653250  | 5.108832  | 1.375263  |
| C  | 1.302417  | 4.566092  | 0.267490  |
| C  | -1.006206 | 3.353110  | 1.279748  |
| C  | -0.497465 | 4.505973  | 1.881352  |
| H  | 1.053307  | 6.019553  | 1.854847  |
| H  | 2.218381  | 5.045261  | -0.122166 |
| H  | 1.321177  | 2.980668  | -1.204174 |
| H  | -1.919940 | 2.898754  | 1.682127  |
| H  | -1.004873 | 4.946854  | 2.758152  |
| H  | -3.035995 | 3.579424  | -0.238131 |
| H  | -3.828057 | 2.866307  | -1.654302 |
| C  | -3.704345 | 1.511380  | 0.025380  |
| H  | -4.691410 | 1.825882  | 0.436751  |
| H  | -3.051962 | 1.300480  | 0.900648  |
| C  | -3.868278 | 0.231199  | -0.785011 |
| H  | -4.676155 | 0.367701  | -1.540107 |
| H  | -4.194376 | -0.595820 | -0.113149 |
| H  | -0.877795 | 0.643517  | -2.570860 |
| C  | -2.596218 | -0.165581 | -1.501380 |
| O  | -2.422266 | -1.291394 | -1.907108 |
| C  | -1.358020 | 3.279349  | -2.476387 |
| H  | -1.338790 | 4.311764  | -2.062631 |
| H  | -0.349136 | 3.063890  | -2.890956 |
| H  | -2.064811 | 3.281295  | -3.335781 |
| C  | 0.594646  | -1.247485 | 2.003235  |
| C  | 0.367764  | -2.137256 | 0.857720  |
| C  | 0.612936  | -2.176927 | -1.430766 |
| O  | 1.320905  | -1.692975 | 3.034594  |
| C  | 0.246641  | -3.522673 | 0.949076  |
| C  | 0.203350  | -4.254519 | -0.231778 |
| C  | 0.454280  | -3.575872 | -1.422683 |
| C  | 1.866670  | -0.534630 | 3.702520  |
| C  | 0.778993  | 0.483744  | 3.338372  |
| H  | 0.224794  | -4.032163 | 1.927022  |
| H  | 0.115956  | -5.355432 | -0.214658 |
| H  | 2.014046  | -0.721577 | 4.782989  |
| H  | 2.844530  | -0.268536 | 3.245098  |
| H  | 1.238709  | 1.496299  | 3.248148  |
| C  | -0.335873 | 0.539871  | 4.416503  |
| C  | -0.952128 | -0.841544 | 4.732085  |

|   |           |           |           |
|---|-----------|-----------|-----------|
| H | -1.757468 | -0.761214 | 5.495626  |
| H | -1.412725 | -1.308967 | 3.834254  |
| H | -0.206455 | -1.557851 | 5.139349  |
| C | 0.229271  | 1.139300  | 5.725828  |
| H | -0.569372 | 1.285717  | 6.486648  |
| H | 0.998030  | 0.490471  | 6.196838  |
| H | 0.699172  | 2.133269  | 5.554788  |
| H | 0.614196  | -4.166620 | -2.339441 |
| C | -1.479879 | 1.457896  | 3.954160  |
| H | -2.299142 | 1.508551  | 4.705165  |
| H | -1.122995 | 2.498218  | 3.801482  |
| H | -1.934416 | 1.096473  | 3.006754  |
| C | 1.358047  | -1.531671 | -2.612066 |
| C | 0.480994  | -1.494950 | -3.880358 |
| H | -0.464545 | -0.937447 | -3.730955 |
| H | 1.010818  | -1.012664 | -4.731553 |
| H | 0.195476  | -2.516729 | -4.214745 |
| C | 1.900828  | -0.122692 | -2.288855 |
| H | 1.101372  | 0.625946  | -2.141499 |
| H | 2.526308  | -0.122171 | -1.368306 |
| H | 2.537599  | 0.270788  | -3.111866 |
| C | 2.615320  | -2.379499 | -2.947823 |
| H | 3.234250  | -1.900006 | -3.738549 |
| H | 3.271793  | -2.509282 | -2.058177 |
| H | 2.368356  | -3.394733 | -3.325840 |

### TS D

FF Calculated Energy: 488.00 kJ/mol

|    |           |           |           |
|----|-----------|-----------|-----------|
| Pd | 0.413562  | 0.515421  | 0.785143  |
| C  | 2.302214  | 0.319988  | -0.190370 |
| C  | 2.692817  | 1.551107  | 0.432806  |
| C  | 0.902322  | 2.502767  | 1.229311  |
| N  | -1.148644 | 0.154965  | 2.250358  |
| N  | -0.434272 | -1.493192 | 0.252373  |
| C  | 3.585965  | 1.479981  | 1.657799  |
| C  | 0.379917  | 3.459046  | 0.332409  |
| C  | 0.197024  | 5.066277  | 2.126578  |
| C  | 0.044346  | 4.737779  | 0.779319  |
| C  | 0.999262  | 2.835504  | 2.599412  |
| C  | 0.661693  | 4.117315  | 3.037727  |
| H  | -0.070916 | 6.078667  | 2.477047  |
| H  | -0.349389 | 5.489228  | 0.071680  |
| H  | 0.236993  | 3.191573  | -0.726289 |
| H  | 1.341288  | 2.088162  | 3.329403  |
| H  | 0.754829  | 4.383900  | 4.105696  |
| H  | 4.650415  | 1.482533  | 1.327489  |
| H  | 3.468012  | 2.384835  | 2.292214  |

|   |           |           |           |
|---|-----------|-----------|-----------|
| C | 3.337106  | 0.209461  | 2.479743  |
| H | 2.299982  | 0.200020  | 2.882625  |
| H | 4.017243  | 0.192432  | 3.362692  |
| C | 3.557597  | -1.041300 | 1.636643  |
| H | 3.256860  | -1.941218 | 2.221006  |
| H | 4.643367  | -1.153566 | 1.412893  |
| H | 2.058521  | 0.316165  | -1.255000 |
| C | 2.795126  | -1.005419 | 0.329545  |
| O | 2.592420  | -2.012236 | -0.308476 |
| C | 3.160114  | 2.657003  | -0.494296 |
| H | 3.218587  | 3.637620  | 0.027649  |
| H | 4.173719  | 2.437477  | -0.897519 |
| H | 2.486597  | 2.780838  | -1.370182 |
| C | -1.389787 | -1.114286 | 2.358860  |
| C | -1.002298 | -2.088223 | 1.318366  |
| C | -0.500313 | -2.164635 | -0.945807 |
| O | -2.093796 | -1.506170 | 3.422063  |
| C | -1.192922 | -3.466089 | 1.400768  |
| C | -0.940107 | -4.230618 | 0.266920  |
| C | -0.649886 | -3.563815 | -0.922753 |
| C | -2.172846 | -0.393053 | 4.340083  |
| C | -1.885597 | 0.776541  | 3.385248  |
| H | -1.574100 | -3.938210 | 2.321657  |
| H | -1.086040 | -5.325460 | 0.278648  |
| H | -3.156104 | -0.362417 | 4.847345  |
| H | -1.375193 | -0.493770 | 5.107882  |
| H | -1.222936 | 1.506681  | 3.906637  |
| C | -3.151158 | 1.523323  | 2.912055  |
| C | -4.174228 | 0.579107  | 2.244809  |
| H | -5.074536 | 1.134278  | 1.899645  |
| H | -3.750585 | 0.069869  | 1.351358  |
| H | -4.534598 | -0.211568 | 2.937805  |
| C | -3.824527 | 2.237557  | 4.104909  |
| H | -4.691256 | 2.853062  | 3.776347  |
| H | -4.210738 | 1.524858  | 4.864656  |
| H | -3.119030 | 2.922356  | 4.625863  |
| H | -0.607556 | -4.148067 | -1.856509 |
| C | -2.755745 | 2.602333  | 1.882459  |
| H | -3.639932 | 3.174438  | 1.523937  |
| H | -2.049386 | 3.340352  | 2.318699  |
| H | -2.269725 | 2.163527  | 0.983627  |
| C | -0.576027 | -1.422209 | -2.290479 |
| C | -1.763724 | -1.981207 | -3.117702 |
| H | -1.907767 | -1.414685 | -4.064504 |
| H | -1.624973 | -3.043376 | -3.413107 |
| H | -2.721295 | -1.917179 | -2.553627 |
| C | -0.854785 | 0.088755  | -2.136399 |
| H | -1.052790 | 0.571608  | -3.118880 |

|   |           |           |           |
|---|-----------|-----------|-----------|
| H | -1.743629 | 0.283919  | -1.495651 |
| H | 0.000222  | 0.637882  | -1.698029 |
| C | 0.708118  | -1.630892 | -3.118118 |
| H | 0.649570  | -1.115551 | -4.102444 |
| H | 1.609299  | -1.240058 | -2.604146 |
| H | 0.897361  | -2.707095 | -3.326276 |

**Figure S7: MM optimized structures of the 4 TS of enone092**

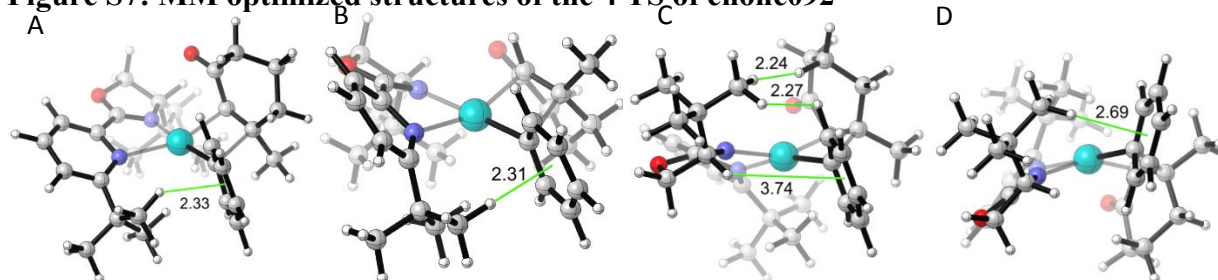

**Table S6 coordinates of the 4 TS catalyzed by the PyrOx ligand containing a t-Bu group in the 6 position(enone092) optimized by QM**

**TS A**

Gibbs Free Energy: -1513.599622 (Hartrees)

Imaginary Frequency: -283.67  $\text{cm}^{-1}$

Cartesian coordinates

|    |             |             |             |
|----|-------------|-------------|-------------|
| Pd | -0.00717900 | -0.67148000 | -0.15491900 |
| C  | 0.58526800  | -2.46724900 | 0.75598600  |
| C  | -0.76773500 | -2.86208300 | 1.00006100  |
| C  | -1.82832800 | -1.58196900 | -0.45430900 |
| N  | -0.25219400 | 2.03043800  | 0.15149900  |
| N  | 1.89929200  | 0.27119500  | -0.05755100 |
| C  | -1.36033800 | -2.49697000 | 2.33375600  |
| C  | -1.83515600 | -2.11598700 | -1.74931800 |
| C  | -4.20842000 | -1.70045900 | -1.89169000 |
| C  | -3.02304200 | -2.15064400 | -2.47515200 |
| C  | -3.01106200 | -1.12773800 | 0.12805800  |
| C  | -4.20243000 | -1.19250600 | -0.59380700 |
| H  | -5.14130200 | -1.74971500 | -2.45053500 |
| H  | -3.02567600 | -2.54604900 | -3.48959900 |
| H  | -0.91651400 | -2.50494600 | -2.19439800 |
| H  | -3.01522500 | -0.70386600 | 1.13268400  |
| H  | -5.12485500 | -0.82860100 | -0.14251000 |
| H  | -2.45527700 | -2.47692000 | 2.27598600  |
| H  | -1.12385100 | -3.35377000 | 2.99216200  |
| C  | -0.77720100 | -1.23159800 | 2.94049800  |
| H  | -1.23328300 | -1.03945000 | 3.91922000  |
| H  | -1.01904700 | -0.35977200 | 2.30660900  |
| C  | 0.73221300  | -1.37416200 | 3.08826300  |
| H  | 0.97051900  | -2.04046300 | 3.93330400  |
| H  | 1.22250300  | -0.41679900 | 3.31767700  |

|   |             |             |             |
|---|-------------|-------------|-------------|
| H | 1.14743900  | -3.02297800 | -0.00372700 |
| C | 1.42203500  | -1.97151000 | 1.88710100  |
| O | 2.63835500  | -2.10309600 | 1.85062900  |
| C | -1.26487800 | -4.14586400 | 0.40564400  |
| H | -2.35914700 | -4.17436900 | 0.34260700  |
| H | -0.83539700 | -4.34915800 | -0.58002900 |
| H | -0.94406300 | -4.95423600 | 1.08156300  |
| C | 1.98720200  | 1.38442100  | 0.57355000  |
| C | 0.82362000  | 2.19773500  | 0.94914900  |
| C | -1.32001000 | 2.80610200  | 0.35166400  |
| O | 3.20726800  | 1.84068100  | 0.83889700  |
| C | 0.87170300  | 3.07784100  | 2.01713500  |
| C | -0.28138400 | 3.81296200  | 2.29173700  |
| C | -1.37129500 | 3.68666600  | 1.44948000  |
| C | 4.12422000  | 0.80480000  | 0.38077200  |
| C | 3.25087300  | -0.13734700 | -0.46340600 |
| H | 1.77411800  | 3.17309000  | 2.61644700  |
| H | -0.31340100 | 4.49436700  | 3.13917400  |
| H | 4.92942600  | 1.30696500  | -0.16251000 |
| H | 4.53020300  | 0.31570600  | 1.27288500  |
| H | 3.41176400  | -1.18078600 | -0.15336700 |
| C | 3.42306500  | -0.04658700 | -1.99597700 |
| C | 3.19061300  | 1.37454400  | -2.50678300 |
| H | 3.32579400  | 1.40567100  | -3.59674500 |
| H | 2.16752300  | 1.71911400  | -2.29286600 |
| H | 3.89517400  | 2.09844200  | -2.07239800 |
| C | 4.83851600  | -0.50762100 | -2.34469200 |
| H | 4.97747300  | -0.50530400 | -3.43460200 |
| H | 5.61229800  | 0.14577900  | -1.91821500 |
| H | 5.02268400  | -1.53064400 | -1.98515900 |
| H | -2.26153700 | 4.28730600  | 1.62504700  |
| C | 2.42442300  | -0.99001300 | -2.66799800 |
| H | 2.59433200  | -1.00952900 | -3.75362700 |
| H | 2.52855200  | -2.01979700 | -2.29277000 |
| H | 1.38480600  | -0.66852600 | -2.50174500 |
| C | -2.45010100 | 2.79738300  | -0.66886600 |
| C | -2.18090800 | 1.82302700  | -1.81124300 |
| H | -2.99520100 | 1.89347900  | -2.54597400 |
| H | -1.23565300 | 2.04994300  | -2.32324100 |
| H | -2.13946000 | 0.78362800  | -1.46587600 |
| C | -3.77280300 | 2.44171900  | 0.01919800  |
| H | -4.06855000 | 3.19593900  | 0.76057000  |
| H | -4.57704300 | 2.37570500  | -0.72737000 |
| H | -3.70760700 | 1.47182200  | 0.53003600  |
| C | -2.55365600 | 4.20918200  | -1.26775300 |
| H | -3.35464700 | 4.23180200  | -2.01988300 |
| H | -2.78731400 | 4.96916700  | -0.51074700 |
| H | -1.61502400 | 4.49727100  | -1.76201600 |



**TS B**Gibbs Free Energy: -1513.594515 (Hartrees)

Imaginary Frequency: -314.13 cm<sup>-1</sup>

Cartesian coordinates

|    |             |             |             |
|----|-------------|-------------|-------------|
| Pd | 0.00106900  | 0.55193300  | -0.12664400 |
| C  | 0.57608100  | 2.44221600  | -0.81469500 |
| C  | -0.72155100 | 3.01636200  | -0.60819900 |
| C  | -1.95049600 | 1.25271100  | -0.40923400 |
| N  | -0.50774600 | -1.77973000 | 0.00305800  |
| N  | 1.84185200  | -0.51012000 | -0.53113700 |
| C  | -0.92317600 | 3.78043900  | 0.67289000  |
| C  | -2.35725700 | 0.72107800  | -1.64432100 |
| C  | -4.65696800 | 0.76688300  | -0.91750400 |
| C  | -3.70100600 | 0.45225200  | -1.88473800 |
| C  | -2.90854300 | 1.52375100  | 0.56982700  |
| C  | -4.25953500 | 1.30101300  | 0.30655800  |
| H  | -5.71267700 | 0.59227500  | -1.11797600 |
| H  | -4.00349000 | 0.02264300  | -2.83850500 |
| H  | -1.62487700 | 0.52489600  | -2.43111200 |
| H  | -2.62172300 | 1.91712700  | 1.54440500  |
| H  | -4.99971400 | 1.53051900  | 1.07187300  |
| H  | -0.60479400 | 4.81318700  | 0.43628800  |
| H  | -1.98872200 | 3.86093500  | 0.91590800  |
| C  | -0.08205400 | 3.25969500  | 1.82500100  |
| H  | -0.35241400 | 2.21391600  | 2.05400800  |
| H  | -0.27820700 | 3.84086100  | 2.73391000  |
| C  | 1.39159900  | 3.34447600  | 1.45528600  |
| H  | 2.03556000  | 2.81771200  | 2.17325300  |
| H  | 1.72811700  | 4.39403100  | 1.46668200  |
| H  | 0.88440200  | 2.25711900  | -1.85081700 |
| C  | 1.70409100  | 2.82379300  | 0.07607000  |
| O  | 2.85589000  | 2.75845100  | -0.33709300 |
| C  | -1.45541900 | 3.56492600  | -1.79715000 |
| H  | -2.52979300 | 3.67209600  | -1.60425200 |
| H  | -1.04391000 | 4.56805800  | -1.99082200 |
| H  | -1.30382900 | 2.96502500  | -2.69970300 |
| C  | 1.52100300  | -1.57173500 | -1.18163200 |
| C  | 0.19557600  | -2.19700100 | -1.07689300 |
| C  | -1.61419000 | -2.44208200 | 0.35016600  |
| O  | 2.47038600  | -2.17750800 | -1.88615100 |
| C  | -0.23917100 | -3.18295700 | -1.94213700 |
| C  | -1.47719900 | -3.76872700 | -1.67023600 |
| C  | -2.14463300 | -3.42378300 | -0.50851700 |
| C  | 3.63522000  | -1.30655700 | -1.78577700 |
| C  | 3.30323900  | -0.36340400 | -0.62077000 |
| H  | 0.36710700  | -3.48054000 | -2.79391100 |
| H  | -1.88793900 | -4.52293600 | -2.33779600 |
| H  | 4.50608300  | -1.94887200 | -1.63113600 |

|   |             |             |             |
|---|-------------|-------------|-------------|
| H | 3.73080000  | -0.78585900 | -2.74477500 |
| H | 3.54902800  | 0.67833700  | -0.86902900 |
| C | 3.96857200  | -0.71341100 | 0.73266500  |
| C | 3.68576200  | -2.15690700 | 1.14878000  |
| H | 4.18263300  | -2.36891200 | 2.10557400  |
| H | 2.60921800  | -2.33419100 | 1.29502000  |
| H | 4.06064300  | -2.89018700 | 0.42052400  |
| C | 5.47446900  | -0.49163600 | 0.59201000  |
| H | 5.97340000  | -0.67365600 | 1.55397000  |
| H | 5.93480600  | -1.16564700 | -0.14404200 |
| H | 5.69393400  | 0.54332000  | 0.29051500  |
| H | -3.06780700 | -3.93480200 | -0.24375600 |
| C | 3.43776700  | 0.22714200  | 1.81444200  |
| H | 3.92621300  | 0.00846100  | 2.77430900  |
| H | 3.64578000  | 1.27579600  | 1.55766000  |
| H | 2.35218000  | 0.11189100  | 1.95509000  |
| C | -2.18872700 | -2.25011800 | 1.74681800  |
| C | -1.91877400 | -3.56623500 | 2.49987500  |
| H | -2.28771900 | -3.47922700 | 3.53136900  |
| H | -2.42403400 | -4.42249000 | 2.03392500  |
| H | -0.84183300 | -3.78395900 | 2.54046300  |
| C | -1.49401900 | -1.13017400 | 2.51581300  |
| H | -1.90317500 | -1.08694000 | 3.53420100  |
| H | -0.41026300 | -1.29672400 | 2.58972000  |
| H | -1.65452100 | -0.15033800 | 2.05041500  |
| C | -3.69686400 | -1.99616900 | 1.70105600  |
| H | -4.07805000 | -1.85273300 | 2.72158500  |
| H | -3.93266200 | -1.09522300 | 1.12077900  |
| H | -4.24864000 | -2.83753600 | 1.26161400  |

## TS C

Gibbs Free Energy: -1513.583918 (Hartrees)

Imaginary Frequency: -388.55 cm<sup>-1</sup>

Cartesian coordinates

|    |             |             |             |
|----|-------------|-------------|-------------|
| Pd | 0.24326400  | -0.45194000 | -0.24952600 |
| C  | 0.54718900  | -2.51066900 | -0.39761400 |
| C  | 1.42860800  | -2.68940800 | 0.72024300  |
| C  | 1.67096800  | -0.61680300 | 1.23947600  |
| N  | 0.08485900  | 1.71516000  | -0.05789300 |
| N  | -2.43852700 | 0.42305400  | 0.05965200  |
| C  | 2.85395100  | -3.17161400 | 0.47657200  |
| C  | 1.11143200  | -0.29052900 | 2.48286900  |
| C  | 3.09245400  | 0.97912000  | 3.03071600  |
| C  | 1.82303500  | 0.51012600  | 3.37263500  |
| C  | 2.93818100  | -0.13097900 | 0.89611100  |
| C  | 3.65183500  | 0.65688600  | 1.79335400  |
| H  | 3.64874500  | 1.59776000  | 3.73274000  |
| H  | 1.38429300  | 0.76698800  | 4.33529600  |

|   |             |             |             |
|---|-------------|-------------|-------------|
| H | 0.11783600  | -0.64741300 | 2.75590000  |
| H | 3.37973600  | -0.36925700 | -0.07160100 |
| H | 4.63859500  | 1.02819400  | 1.52006900  |
| H | 3.58768300  | -2.41296000 | 0.76686000  |
| H | 3.02432700  | -4.00792200 | 1.17022600  |
| C | 3.10721800  | -3.63659800 | -0.95552400 |
| H | 2.64206000  | -4.62202900 | -1.11056000 |
| H | 4.18415600  | -3.77332200 | -1.11056600 |
| C | 2.53970100  | -2.66024500 | -1.97927800 |
| H | 2.73716600  | -2.97382800 | -3.01083200 |
| H | 2.99170300  | -1.66186500 | -1.85744300 |
| H | -0.48980000 | -2.84527300 | -0.27372900 |
| C | 1.05035700  | -2.54940600 | -1.79565400 |
| O | 0.26479700  | -2.50829900 | -2.73595700 |
| C | 0.81709400  | -3.22377500 | 1.98076500  |
| H | 1.46803100  | -3.06751500 | 2.84848400  |
| H | -0.17643300 | -2.81434800 | 2.18914200  |
| H | 0.70449300  | -4.31065100 | 1.84249500  |
| C | -0.99416500 | 2.31747000  | 0.29075100  |
| C | -2.33860300 | 1.72495100  | 0.36081700  |
| C | -3.64519000 | -0.15825000 | 0.11026100  |
| O | -0.89386800 | 3.61228800  | 0.60292500  |
| C | -3.42170400 | 2.52416400  | 0.71573000  |
| C | -4.67673100 | 1.93002500  | 0.74458100  |
| C | -4.78956200 | 0.58139100  | 0.44123800  |
| C | 0.52204700  | 3.91360700  | 0.60741100  |
| C | 1.15905700  | 2.72368500  | -0.12120000 |
| H | -3.27880700 | 3.57394300  | 0.95584800  |
| H | -5.55779500 | 2.51227300  | 1.00621000  |
| H | 0.65224300  | 4.88407900  | 0.12125000  |
| H | 0.83648300  | 3.98680800  | 1.65540100  |
| H | 2.02390200  | 2.34723500  | 0.44360300  |
| C | 1.62375000  | 3.00716100  | -1.56952600 |
| C | 0.48344700  | 3.54715600  | -2.43103400 |
| H | 0.84860200  | 3.74686900  | -3.44786400 |
| H | -0.33923000 | 2.82274400  | -2.51417400 |
| H | 0.07276400  | 4.49043600  | -2.04412100 |
| C | 2.76333300  | 4.02617800  | -1.50341200 |
| H | 3.16526700  | 4.20619400  | -2.50995300 |
| H | 2.44282400  | 4.99833400  | -1.10431600 |
| H | 3.58770500  | 3.65601500  | -0.87474300 |
| H | -5.76542400 | 0.10494800  | 0.46458000  |
| C | 2.17262500  | 1.73087400  | -2.20626700 |
| H | 2.52970300  | 1.94406300  | -3.22347700 |
| H | 3.02331000  | 1.33514400  | -1.63212500 |
| H | 1.41121200  | 0.93968200  | -2.28311400 |
| C | -3.69423700 | -1.65491800 | -0.16761500 |
| C | -3.08669300 | -1.93713600 | -1.54454500 |

|   |             |             |             |
|---|-------------|-------------|-------------|
| H | -2.07657800 | -1.52553400 | -1.65470300 |
| H | -3.02694900 | -3.02159200 | -1.71615500 |
| H | -3.71044700 | -1.50228700 | -2.33863200 |
| C | -2.89760000 | -2.34931900 | 0.94374200  |
| H | -1.90147800 | -1.90037700 | 1.05062200  |
| H | -3.41080500 | -2.25153000 | 1.91124000  |
| H | -2.78173400 | -3.42161300 | 0.72620600  |
| C | -5.11707300 | -2.21053300 | -0.15522100 |
| H | -5.08302400 | -3.28787800 | -0.36644300 |
| H | -5.60585900 | -2.08551400 | 0.82097300  |
| H | -5.74872600 | -1.74486100 | -0.92476200 |

## TS D

Gibbs Free Energy: -1513.599826 (Hartrees)

Imaginary Frequency: -339.60 cm<sup>-1</sup>

Cartesian coordinates

|    |             |             |             |
|----|-------------|-------------|-------------|
| Pd | 0.03622500  | -0.52366700 | 0.17106300  |
| C  | 1.00563100  | -2.37057400 | -0.19755000 |
| C  | -0.23624400 | -3.00035200 | -0.54768000 |
| C  | -1.65613200 | -1.69743300 | 0.33173400  |
| N  | -0.92862300 | 1.37813800  | -0.37156600 |
| N  | 1.71663200  | 0.99438700  | 0.11391600  |
| C  | -0.60526700 | -3.02875800 | -2.01055200 |
| C  | -1.85590600 | -1.98886800 | 1.68899500  |
| C  | -4.24404800 | -1.92342900 | 1.35213300  |
| C  | -3.14720600 | -2.08872800 | 2.19843000  |
| C  | -2.75871700 | -1.50811200 | -0.50716700 |
| C  | -4.04925000 | -1.63094200 | 0.00215900  |
| H  | -5.25413300 | -2.02026700 | 1.74645100  |
| H  | -3.29618700 | -2.30817300 | 3.25436600  |
| H  | -1.00234300 | -2.15285500 | 2.34978900  |
| H  | -2.62422500 | -1.25986300 | -1.55999700 |
| H  | -4.90407300 | -1.48694800 | -0.65741100 |
| H  | -0.13172300 | -3.94813500 | -2.40194900 |
| H  | -1.68389300 | -3.18619400 | -2.13075700 |
| C  | -0.08965400 | -1.84192900 | -2.80479500 |
| H  | -0.55475400 | -0.90728100 | -2.44788900 |
| H  | -0.37048500 | -1.94592300 | -3.86016700 |
| C  | 1.42387500  | -1.75624200 | -2.67332800 |
| H  | 1.82927600  | -0.81145000 | -3.06261100 |
| H  | 1.89944400  | -2.55319500 | -3.26866500 |
| H  | 1.50573200  | -2.71776100 | 0.71311700  |
| C  | 1.94434000  | -1.93633000 | -1.26809800 |
| O  | 3.13246100  | -1.77306900 | -1.01791600 |
| C  | -0.63827900 | -4.23532100 | 0.20990200  |
| H  | -1.70884700 | -4.44993600 | 0.10449100  |
| H  | -0.07749400 | -5.07630200 | -0.22705400 |
| H  | -0.37944100 | -4.18326600 | 1.27177100  |

|   |             |             |             |
|---|-------------|-------------|-------------|
| C | -0.06014200 | 2.01766600  | -1.07203600 |
| C | 1.38739100  | 1.82730300  | -0.90654200 |
| C | 2.98541200  | 0.93095000  | 0.52928100  |
| O | -0.50394900 | 2.92996200  | -1.93241000 |
| C | 2.32221900  | 2.50225400  | -1.66590200 |
| C | 3.66782200  | 2.30964700  | -1.34252500 |
| C | 3.99235800  | 1.55991000  | -0.22805000 |
| C | -1.95439800 | 2.80688200  | -1.91400100 |
| C | -2.24941000 | 1.94041700  | -0.67728500 |
| H | 2.01007300  | 3.15452500  | -2.47725100 |
| H | 4.44852400  | 2.78460000  | -1.93231900 |
| H | -2.36691000 | 3.81898700  | -1.88119000 |
| H | -2.24692000 | 2.32502400  | -2.85339500 |
| H | -2.93425200 | 1.11801000  | -0.93565000 |
| C | -2.84359100 | 2.67793300  | 0.54291100  |
| C | -1.99140400 | 3.88097400  | 0.94322500  |
| H | -2.43279700 | 4.37104400  | 1.82205200  |
| H | -0.96943100 | 3.57934700  | 1.21507300  |
| H | -1.92718500 | 4.63908400  | 0.14972300  |
| C | -4.25755700 | 3.12824700  | 0.17740700  |
| H | -4.72761900 | 3.63185600  | 1.03329400  |
| H | -4.27129400 | 3.83544500  | -0.66429900 |
| H | -4.88766100 | 2.26709500  | -0.09261600 |
| H | 5.03221500  | 1.46819200  | 0.07719800  |
| C | -2.92410300 | 1.70845700  | 1.72192600  |
| H | -3.41972900 | 2.19512800  | 2.57369900  |
| H | -3.50409100 | 0.80946300  | 1.46412700  |
| H | -1.92676300 | 1.38424400  | 2.05044300  |
| C | 3.32545100  | 0.33014600  | 1.89015400  |
| C | 3.89535100  | 1.48969800  | 2.73098000  |
| H | 4.11733300  | 1.12772100  | 3.74429200  |
| H | 4.82559800  | 1.89435600  | 2.31236900  |
| H | 3.17113100  | 2.31250100  | 2.81469600  |
| C | 2.10387200  | -0.20394000 | 2.63192700  |
| H | 2.40781800  | -0.51176400 | 3.64139800  |
| H | 1.31621400  | 0.55640200  | 2.73291700  |
| H | 1.66903700  | -1.08365500 | 2.14133200  |
| C | 4.37735000  | -0.77716700 | 1.77995700  |
| H | 4.65119700  | -1.11761000 | 2.78817800  |
| H | 3.99379000  | -1.63067200 | 1.20843900  |
| H | 5.29577900  | -0.43004800 | 1.28759900  |

**Figure S8 Structures in Enone Screen**

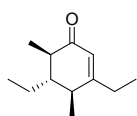

enone24

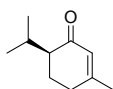

enone25

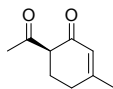

enone26

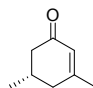

enone27

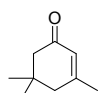

enone28

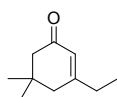

enone29

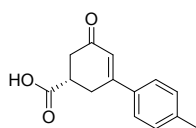

enone30

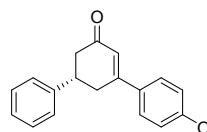

enone31

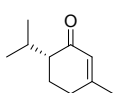

enone32

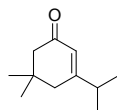

enone33

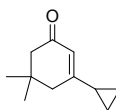

enone34

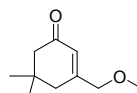

enone35

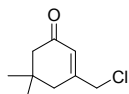

enone36

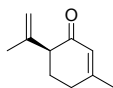

enone37

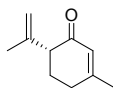

enone38

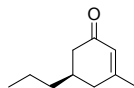

enone39

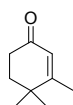

enone40

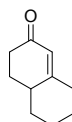

enone41

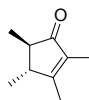

enone42

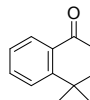

enone43

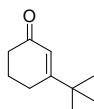

enone44

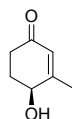

enone45

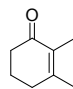

enone46

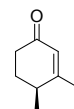

enone47

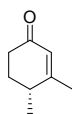

enone48

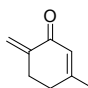

enone49

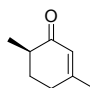

enone50

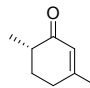

enone51

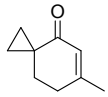

enone52

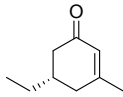

enone53

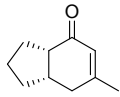

enone54

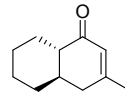

enone55

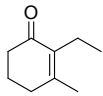

enone56

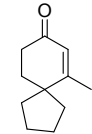

enone57

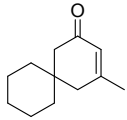

enone58

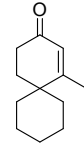

enone59

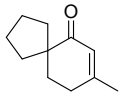

enone60

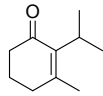

enone61

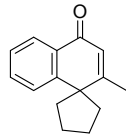

enone62

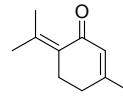

enone63

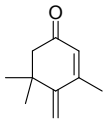

enone64

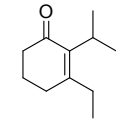

enone65

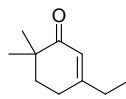

enone66

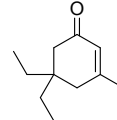

enone67

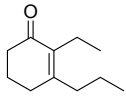

enone68

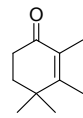

enone69

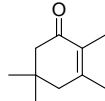

enone70

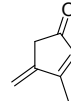

enone71

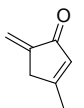

enone72

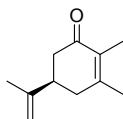

enone73

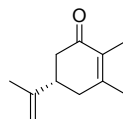

enone74

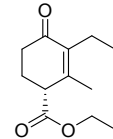

enone75

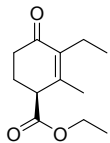

enone76

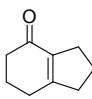

enone77

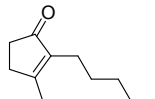

enone78

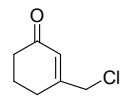

enone79

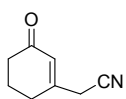

enone80

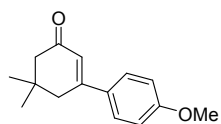

enone81

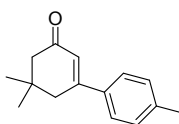

enone82

**Table S7: Results for Substrate Screen**

|          | Ligand | Enone   | Aryl   | Abs. Conf. | Temp. (K) | ee (calc.) | ln(er) (calc.) |
|----------|--------|---------|--------|------------|-----------|------------|----------------|
| enone109 | PyOx1  | enone24 | aryl12 | S          | 333       | -98.3      | -4.76          |
| enone110 | PyOx1  | enone25 | aryl12 | R          | 333       | 49.9       | 1.10           |
| enone111 | PyOx1  | enone26 | aryl12 | R          | 333       | 49.4       | 1.08           |
| enone112 | PyOx1  | enone27 | aryl12 | R          | 333       | 82.1       | 2.32           |
| enone113 | PyOx1  | enone28 | aryl12 | R          | 333       | 97.5       | 4.37           |
| enone114 | PyOx1  | enone29 | aryl12 | R          | 333       | 97.8       | 4.50           |
| enone115 | PyOx1  | enone30 | aryl12 | S          | 333       | -57.7      | -1.32          |
| enone116 | PyOx1  | enone31 | aryl12 | S          | 333       | -87.3      | -2.69          |
| enone117 | PyOx1  | enone32 | aryl12 | R          | 333       | 97.2       | 4.25           |
| enone118 | PyOx1  | enone33 | aryl12 | R          | 333       | 98.1       | 4.65           |
| enone119 | PyOx1  | enone34 | aryl12 | R          | 333       | 92.5       | 3.25           |
| enone120 | PyOx1  | enone35 | aryl12 | S          | 333       | -97        | -4.18          |
| enone121 | PyOx1  | enone36 | aryl12 | S          | 333       | -97.3      | -4.29          |
| enone122 | PyOx1  | enone37 | aryl12 | R          | 333       | 72.6       | 1.84           |
| enone123 | PyOx1  | enone38 | aryl12 | R          | 333       | 96.8       | 4.12           |
| enone124 | PyOx1  | enone39 | aryl12 | R          | 333       | 94.9       | 3.64           |
| enone125 | PyOx1  | enone40 | aryl12 | S          | 333       | -97.8      | -4.50          |
| enone126 | PyOx1  | enone41 | aryl12 | R          | 333       | 98.8       | 5.11           |
| enone127 | PyOx1  | enone42 | aryl12 | S          | 333       | -99.6      | -6.21          |
| enone128 | PyOx1  | enone43 | aryl12 | R          | 333       | 90.3       | 2.98           |
| enone129 | PyOx1  | enone44 | aryl12 | R          | 333       | 85.2       | 2.53           |
| enone130 | PyOx1  | enone45 | aryl12 | R          | 333       | 99.1       | 5.40           |
| enone131 | PyOx1  | enone46 | aryl12 | S          | 333       | -53.1      | -1.18          |
| enone132 | PyOx1  | enone47 | aryl12 | S          | 333       | -99.9      | -7.60          |
| enone133 | PyOx1  | enone48 | aryl12 | R          | 333       | 76.8       | 2.03           |
| enone134 | PyOx1  | enone49 | aryl12 | R          | 333       | 59.7       | 1.38           |
| enone135 | PyOx1  | enone50 | aryl12 | R          | 333       | 82.4       | 2.34           |
| enone136 | PyOx1  | enone51 | aryl12 | R          | 333       | 88.3       | 2.78           |
| enone137 | PyOx1  | enone52 | aryl12 | R          | 333       | 63.6       | 1.50           |
| enone138 | PyOx1  | enone53 | aryl12 | R          | 333       | 77.6       | 2.07           |
| enone139 | PyOx1  | enone54 | aryl12 | R          | 333       | 3.7        | 0.07           |
| enone140 | PyOx1  | enone55 | aryl12 | R          | 333       | 93.5       | 3.39           |
| enone141 | PyOx1  | enone56 | aryl12 | S          | 333       | -61.7      | -1.44          |
| enone142 | PyOx1  | enone57 | aryl12 | S          | 333       | -94.6      | -3.58          |
| enone143 | PyOx1  | enone58 | aryl12 | R          | 333       | 97.4       | 4.33           |
| enone144 | PyOx1  | enone59 | aryl12 | S          | 333       | -97.8      | -4.50          |
| enone145 | PyOx1  | enone60 | aryl12 | R          | 333       | 70.1       | 1.74           |
| enone146 | PyOx1  | enone61 | aryl12 | S          | 333       | -81.1      | -2.26          |
| enone147 | PyOx1  | enone62 | aryl12 | R          | 333       | 93.6       | 3.41           |
| enone148 | PyOx1  | enone63 | aryl12 | R          | 333       | 58.9       | 1.35           |



|          |       |         |        |   |     |       |       |
|----------|-------|---------|--------|---|-----|-------|-------|
| enone149 | PyOx1 | enone64 | aryl12 | R | 333 | 94.6  | 3.58  |
| enone150 | PyOx1 | enone65 | aryl12 | S | 333 | -76.3 | -2.01 |
| enone151 | PyOx1 | enone66 | aryl12 | R | 333 | 68.4  | 1.67  |
| enone152 | PyOx1 | enone67 | aryl12 | R | 333 | 97.3  | 4.29  |
| enone153 | PyOx1 | enone68 | aryl12 | S | 333 | -72.6 | -1.84 |
| enone154 | PyOx1 | enone69 | aryl12 | R | 333 | -3.2  | -0.06 |
| enone155 | PyOx1 | enone70 | aryl12 | S | 333 | -48.6 | -1.06 |
| enone156 | PyOx1 | enone71 | aryl12 | S | 333 | -84.5 | -2.48 |
| enone157 | PyOx1 | enone72 | aryl12 | R | 333 | 86.2  | 2.60  |
| enone158 | PyOx1 | enone73 | aryl12 | R | 333 | 43.7  | 0.94  |
| enone159 | PyOx1 | enone74 | aryl12 | S | 333 | -93.3 | -3.36 |
| enone160 | PyOx1 | enone75 | aryl12 | R | 333 | 99.8  | 6.91  |
| enone161 | PyOx1 | enone76 | aryl12 | S | 333 | -96.4 | -4.00 |
| enone162 | PyOx1 | enone77 | aryl12 | S | 333 | -41.7 | -0.89 |
| enone163 | PyOx1 | enone78 | aryl12 | S | 333 | -30.6 | -0.63 |
| enone164 | PyOx1 | enone79 | aryl12 | S | 333 | -91.1 | -3.07 |
| enone165 | PyOx1 | enone80 | aryl12 | S | 333 | -90.4 | -2.99 |
| enone166 | PyOx1 | enone81 | aryl12 | S | 333 | -96.4 | -4.00 |
| enone167 | PyOx1 | enone82 | aryl12 | S | 333 | -96.4 | -4.00 |

**Figure S9: Chromatogram of the racemic  $\pm$ 3-methyl-3-phenylcyclohexanone**

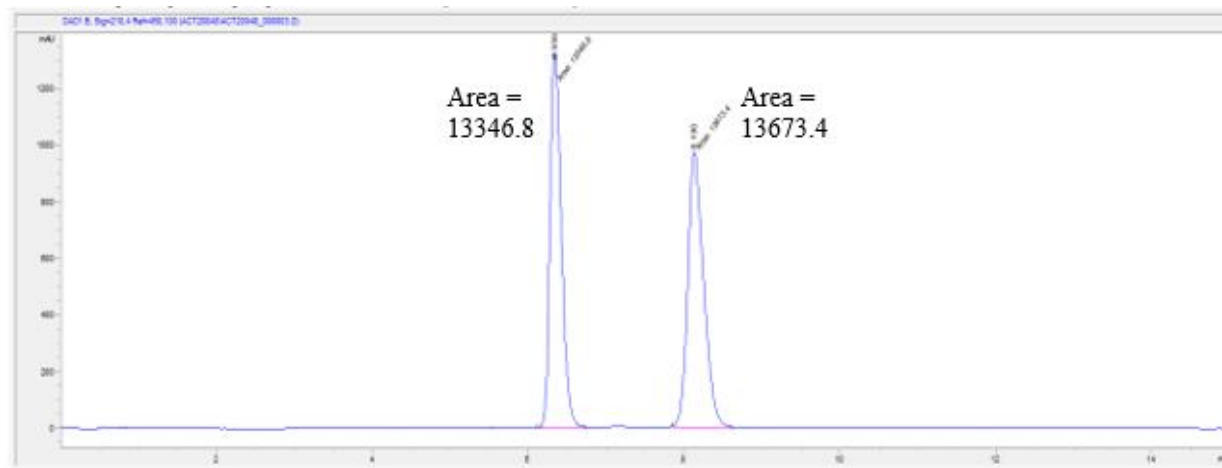

**Figure S10: Chromatogram of sample obtained using the (S)-*tert*-butylPyrOx ligand**

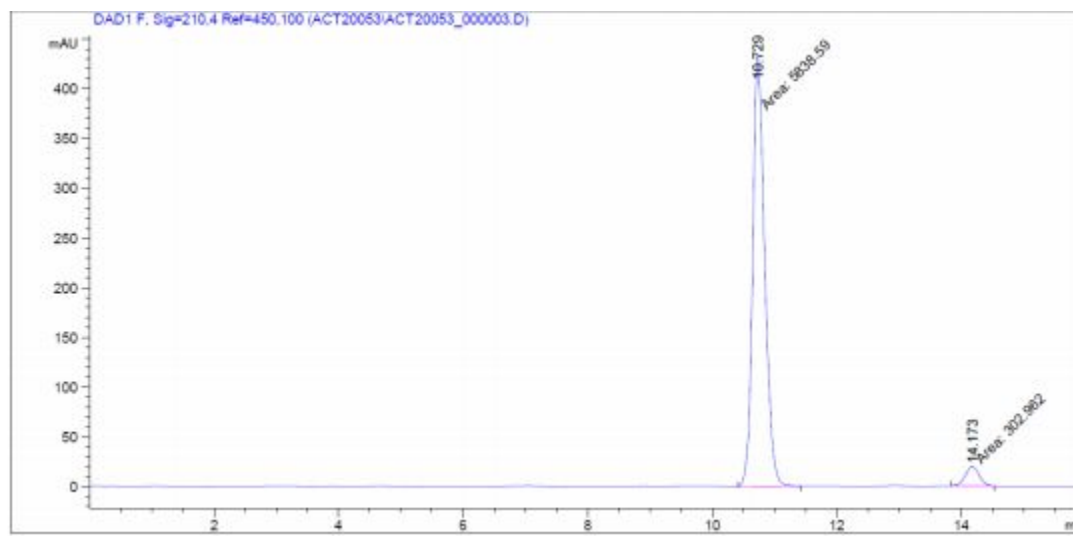

Figure S11: Chromatogram of sample obtained using the CF<sub>3</sub> substituted ligand

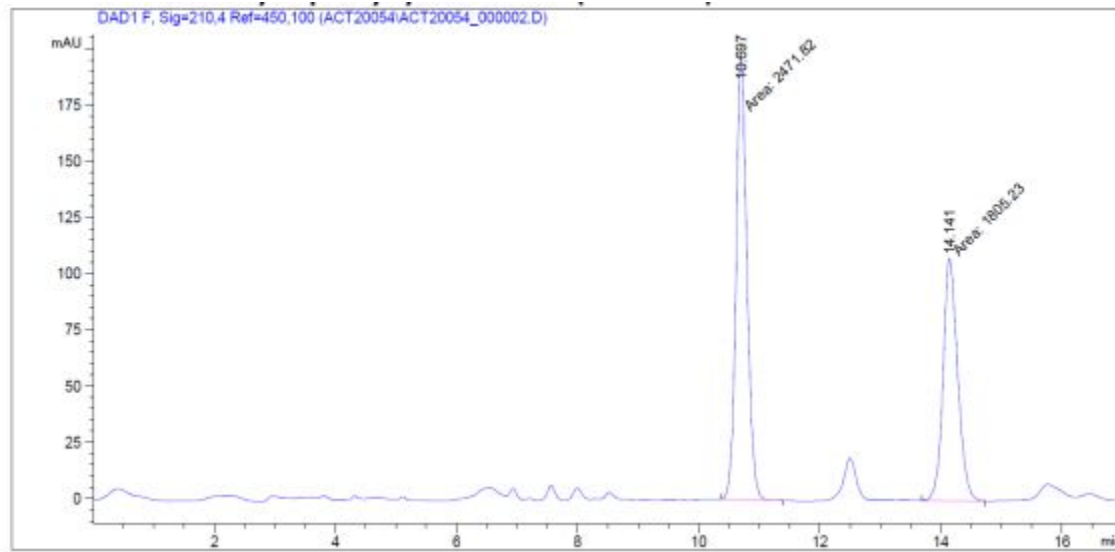

Figure S12: <sup>1</sup>H NMR (CDCl<sub>3</sub>, 400 MHz) of sample obtained using the CF<sub>3</sub> substituted ligand

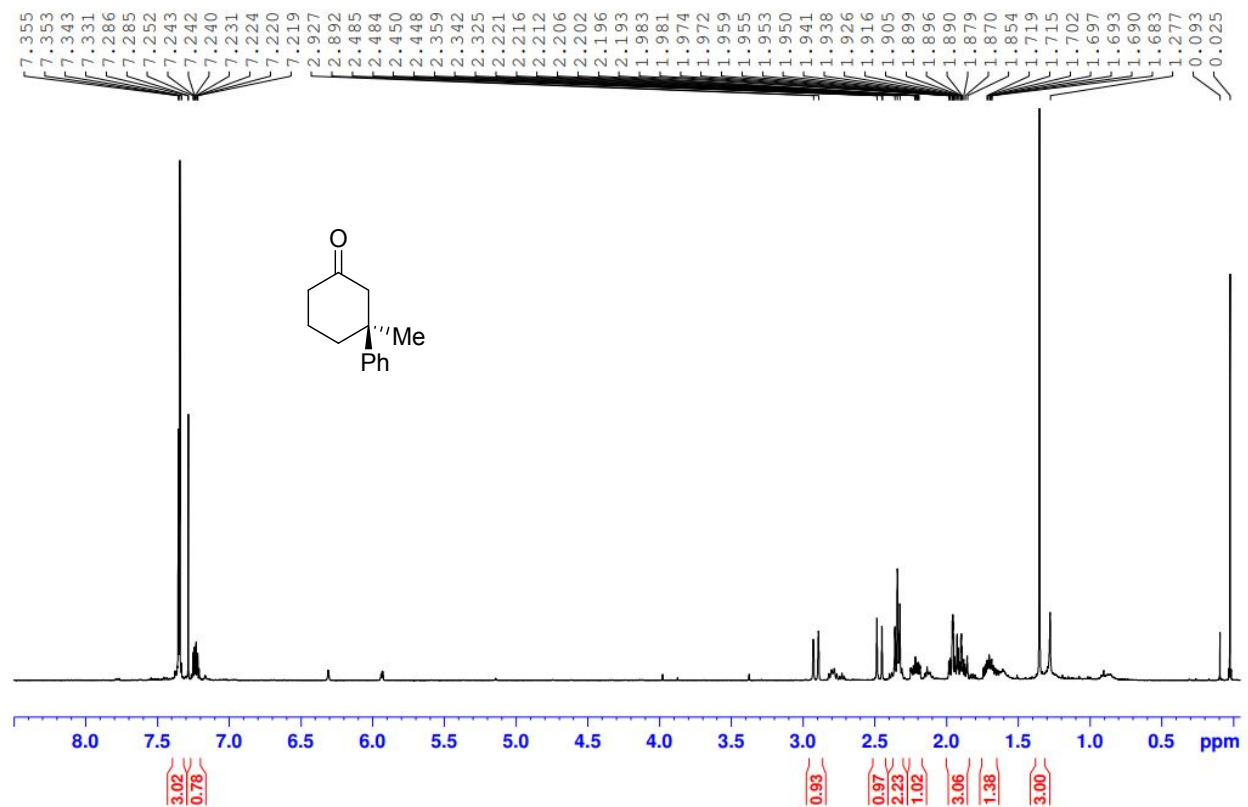

Supplement: NIHMS1697230-supplement-Supporting_Information.pdf [file NIHMS1697230-supplement-Supporting_Information.pdf]
